1 **Maternal obesity shapes the B lymphocyte and antibody repertoires of**  
2 **human colostrum**

3  
4 Erick Sánchez-Salguero<sup>1</sup>, Diana Bonilla-Ruelas<sup>1</sup>, Mario René Alcorta-García<sup>2,4</sup>,  
5 Víctor Javier Lara-Díaz<sup>3,6</sup>, Claudia Nohemí López-Villaseñor<sup>2,4</sup>, Marion E G  
6 Brunck<sup>1,5\*</sup>

7 <sup>1</sup> The Institute for Obesity Research, Tecnológico de Monterrey, Av. Eugenio Garza Sada  
8 2501 Sur, Tecnológico, 64700, Monterrey, Nuevo León, México.

9 <sup>2</sup> Hospital Regional Materno Infantil, Servicios de Salud de Nuevo León, OPD, Av. San  
10 Rafael 460, San Rafael, 67140 Guadalupe, Nuevo León, México.

11 <sup>3</sup> Pediatras404, San Pedro Garza Garcia, Nuevo León, México.

12 <sup>4</sup> School of Medicine and Health Sciences, Tecnológico de Monterrey, Av. Eugenio Garza  
13 Sada 2501 Sur, Tecnológico, 64849, Monterrey, Nuevo León, México.

14 <sup>5</sup> School of Engineering and Sciences, Tecnológico de Monterrey, Av. Eugenio Garza  
15 Sada 2501 Sur, Tecnológico, 64849, Monterrey, Nuevo León, México.

16 <sup>6</sup> University of New South Wales, Faculty of Medicine, Sydney, Australia.

17

18

19 \*Correspondence to: [marion.brunck@tec.mx](mailto:marion.brunck@tec.mx)

20

21 **ABSTRACT**

22

23 The prevalence of obesity is rapidly increasing worldwide and its impact on future  
24 generations must be assessed. We recently showed that colostrum from mothers  
25 with obesity contained a significantly reduced B lymphocytes (CD19<sup>+</sup>) fraction.  
26 Here, in a subsequent transversal cohort study of 48 mothers, we exhaustively  
27 characterize the B lymphocytes subsets present in peripheral blood and colostrum  
28 from obese mothers and describe a pervasive alteration of the B lymphocytes  
29 compartment of human colostrum accompanied by a dysregulated antibody  
30 composition. We describe significant decreases in regulatory B cells and soluble  
31 IgA concentrations, combined with increases in soluble IgG and double negative 2  
32 (CD19<sup>+</sup>, CD27<sup>-</sup>, IgD<sup>-</sup>, CD38<sup>-</sup>, CD24<sup>-</sup>, CD21<sup>-</sup>, CD11c<sup>+</sup>) B lymphocytes. These

33 alterations correlated with maternal BMI and corporal fat %. We provide evidence  
34 for possibly autoimmune IgG present in obese colostrum, and for the  
35 proinflammatory consequences of obese colostrum *in vitro*. Beyond the impact of  
36 obesity, we evidence the selective presence of B lymphocyte subtypes in  
37 colostrum and *in situ* production of IgG antibodies, which expands our current  
38 understanding of the origin of colostrum IgG. As maternal milk antibodies play a  
39 crucial role in regulating neonatal gut immune development, this work uncovers  
40 maternal obesity as a potential risk factor for compromised breastmilk immune  
41 components, calling for more research on the long-term health of lactating infants.

42

43 **KEYWORDS:** Colostrum, Obesity, B lymphocytes, IgG, IgA

44

45

46

47

48

49

50

51

52

53

54

55

56

57

## 58 1. INTRODUCTION

59

60 Tolerizing responses in the gut allow the establishment of the microbiota and  
61 efficient food digestion, contributing to health. Disruptions in these tolerizing  
62 responses cause inflammation that promote disease. For example, in ulcerative  
63 colitis, immune tolerance to commensal microbes is impaired<sup>1</sup>. This prevents the  
64 expansion of a tolerizing ROR $\gamma^+$  Treg population, fueling gut inflammation that  
65 primes the disease<sup>2</sup>. Interestingly, ROR $\gamma^+$  Treg populations essential to the  
66 establishment of the microbiota are transmitted exclusively through breastmilk and  
67 persist through adulthood<sup>3</sup>. Therefore, essential immune responses in the adult gut  
68 are imprinted at least in part during breastfeeding and inappropriate responses  
69 prime adverse conditions later in life<sup>4</sup>.

70

71 Maternal obesity is a rising condition worldwide that correlates with variations in  
72 multiples breastmilk components including the microbiota, Human-milk  
73 oligosaccharides (HMO) and lipids<sup>5-8</sup>. However, reports on immune bioactives like  
74 cytokines and leukocytes remain scarce<sup>9-12</sup>. We recently evidenced a significant  
75 reduction of the B lymphocytes compartment in the colostrum of mothers with  
76 obesity<sup>13</sup>. Here, we further characterize 18 B lymphocytes subpopulations in obese  
77 colostrum and describe pervasive alterations of the resolved populations, including  
78 less B<sub>reg</sub>-like and more of a recently described pro-inflammatory B lymphocyte  
79 population, also known as double-negative 2 (DN2) B cells<sup>14,15</sup>. These alterations  
80 at the cellular level are accompanied by significant regulations in colostrum  
81 antibodies, including less soluble IgA (slgA), and more soluble IgG (slgG).  
82 Interestingly, obese colostrum slgG had increased recognition of N-  
83 acetylglucosamine (GlcNAc) which is present on bacterial and fungal cell walls, but  
84 also composes various human tissues, hinting toward a possible transfer of  
85 autoimmunity<sup>16-18</sup>. Finally, we show that in contrast to colostrum from "lean"  
86 mothers, obese colostrum leads to activation of human macrophages *in vitro*.  
87 Overall, we describe here that maternal obesity regulates B lymphocytes subsets

88 and antibodies in human colostrum, with possible long-lasting impact on the  
89 suckling neonate's health.

90

## 91 **2. MATERIALS AND METHODS**

92

### 93 **2.1 Human samples**

94 This cross-sectional study was approved by the Ethics Committee of the Hospital  
95 Regional Materno Infantil, Servicios de Salud de Nuevo León, and by the IRB at  
96 the School of Medicine and Health Sciences, TecSalud, in Monterrey, Mexico  
97 (CarlMicrobio2018, Reg. No. DEISC-19 01 18 09). Eligible women attending the  
98 hospital for delivery were recruited between September 2022 and April 2023.  
99 Participation in the study was based on the following inclusion criteria: (1) maternal  
100 age between 18 and 34 years, (2) over 5 prenatal visits without any adverse event  
101 during pregnancy, (3) pre-pregnancy BMI >18.5 and <25, or >30, (4) term infant,  
102 and (5) willingness to participate. Exclusion criteria included (1) having received  
103 antibiotics anytime during the 3-month period before birth, or having received a  
104 prolonged antibiotic treatment (>3 months) anytime during pregnancy, (2) having  
105 received immunosuppressive doses of steroids during pregnancy, (3) history of any  
106 monoclonal antibody treatment, (4) history of chronic disease (outside of obesity),  
107 (5) suffering from any nutrition-related disease or dietary restrictions, (6) episodes  
108 of diarrhea during the last 2 weeks of pregnancy, (7) history of surgery within 12  
109 months prior to pregnancy, (8) history of antineoplastic treatment. Elimination  
110 criteria included (1) having received antibiotics for >24 h post-birth, (2) newborn  
111 admission to NICU, (3) any additional cause impeding sample collection. Oxytocin  
112 was not used during labor. Pre-pregnancy weight was recalled, current height was  
113 measured and current body fat percentage (BF%) obtained by impedance at the  
114 time of recruitment. Additional variables collected or measured in this work  
115 included maternal age, primiparity, infant gender, gestational age at birth, mode of  
116 delivery, weight of infant at birth, volume of colostrum obtained, frequency of B  
117 lymphocytes subpopulations in blood and colostrum samples, type and  
118 concentrations of antibodies and frequency of antibody-producing cells in

119 colostrum. Additional details are included in the study's STROBE statement  
120 (Supplementary Table 1). Participants were allocated to the "obese" (BMI>30,  
121 BF%>30) or "lean" (18.5>BMI<25, BF%<22) groups according to the WHO  
122 guidelines. Upon recruitment and signed informed consent, 4 ml of maternal  
123 peripheral blood were drawn into K<sub>2</sub>EDTA coated tubes (BD Vacutainer®, cat.  
124 366643). The same day, after infant feeding, the nipple area of the breast was  
125 gently cleaned with neutral soap and water, and 1-3 ml of colostrum were collected  
126 using a manual pump. Samples were immediately stored on ice until processing  
127 and all samples were processed within 2 h of collection.

128

## 129 **2.2 Isolation of PBMC from peripheral blood**

130 Ficoll-Paque (Fisher scientific, cat. 17-1440-03) was used to enrich PBMC from  
131 peripheral blood and residual erythrocytes were lysed using Pharm Lyse Solution  
132 (BD, cat. 555899), as per manufacturer's instructions. Cells were manually  
133 counted using a Neubauer chamber, using 0.4% Trypan blue to discriminate dead  
134 cells). Three million live PBMC were then stained for flow cytometry in a total  
135 volume of 100 µl.

136

## 137 **2.3 Cell enrichment from colostrum**

138 Approximately 2 ml of colostrum were processed for cell enrichment prior to  
139 staining for flow cytometry, as previously reported<sup>13,19</sup>. Briefly, colostrum volumes  
140 were recorded, and samples were centrifuged at 400 rcf for 15 min at 4°C.  
141 Supernatant were stored away, and cell pellet were washed twice with PBS/1%  
142 FBS/2mM EDTA. Cells were manually counted using a Neubauer chamber using  
143 0.4% Trypan blue to discriminate dead cells. Two million live cells were then  
144 stained for flow cytometry in a total volume of 100 µl.

145

## 146 **2.4 Flow cytometry**

147 The same conjugated monoclonal antibodies were used to stain both tissue types,  
148 and antibody and viability stains were titrated independently for each tissue. PBMC  
149 were staining with 1.38 µl of CD19-PerCP Cy5.5 (BioLegend, catalog number

150 302230), 5  $\mu$ l of CD21-PE/Dazzle™ 594 (BioLegend, catalog number 354922), 5  
151  $\mu$ l of CD24-Brilliant Violet 786™ (BioLegend, catalog number 311142), 2  $\mu$ l of  
152 CD27-APC (BioLegend, catalog number 302810), 2.5  $\mu$ l of CD38-Alexa Fluor® 700  
153 (BioLegend, catalog number 397206), 2  $\mu$ l of IgA-VioGreen (Miltenyi Biotec,  
154 catalog number 130-113-481), 3  $\mu$ l of IgG APC Cy7 (BioLegend, catalog number  
155 410732), 3  $\mu$ l of IgD-VioBlue (Miltenyi Biotec, catalog number 130-123-258), and 5  
156  $\mu$ l of CD11c-Brilliant Violet 605™ (BioLegend, catalog number 744436), and 1  $\mu$ l  
157 of Zombie Green (BioLegend, catalog number 423111); in a final volume of 100  $\mu$ l  
158 of PBS/1% FBS/2mM EDTA. As previous publications suggested we optimized  
159 staining times for optimal resolution, and incubated 90 min at 4°C in the dark<sup>20</sup>.  
160 For colostrum cells,  $2 \times 10^6$  cells were stained using a cocktail including 1.38  $\mu$ l  
161 CD19-PerCP Cy5.5, 5  $\mu$ l CD21-PE/Dazzle™ 594, 5  $\mu$ l CD24-Brilliant Violet  
162 786™, 2  $\mu$ l CD27-APC, 3  $\mu$ l CD38-Alexa Fluor® 700, 5  $\mu$ l IgA-VioGreen, 5  $\mu$ l IgG-  
163 APC Cy7, 5  $\mu$ l IgD-VioBlue, 5  $\mu$ l IgG-APC Cy7, and 5  $\mu$ l CD11c-Brilliant Violet  
164 605™; in a final volume of 100  $\mu$ l of PBS/1% FBS/2mM EDTA. After incubation,  
165 samples were washed and resuspended in PBS/1% FBS/2mM EDTA for  
166 immediate acquisition on a BD® FACSCelesta flow cytometer fitted with 405 nm,  
167 488 nm, and 633 nm lasers and operated through the BD® FACSDiva software  
168 v.8. Compensation controls were used at each acquisition using compensation  
169 beads following manufacturer's recommendations, and automatic compensation  
170 was performed prior to acquisition. Over  $10^6$  events were recorded from each  
171 sample, with the FSC threshold adjusted to 50,000 or 5,000 for blood and  
172 colostrum, respectively. Analysis was performed using FlowJo X 10.0.7r2. The  
173 gating strategy initially optimized was based on previous reports and CD45 stained  
174 samples but FMO controls were used to adjust gates for both sample types<sup>21,22</sup>.  
175 The gating strategy is described in Supplementary Fig. 1.

176

## 177 **2.5 IgM, sIgA and sIgG ELISA**

178 Flat-bottom 96-well polystyrene plates were coated with 1:5000 PBS-diluted mouse  
179 anti-human monoclonal antibody for either IgM (Abcam, cat. ab200541), IgA  
180 (Abcam, cat. ab7400b) or IgG (Abcam, cat. ab72528), and incubated 12 h at 4 °C.

181 After blocking, dilutions of plasma or colostrum supernatants were incubated for 2  
182 h at 37 °C. For detection, anti-human IgG, IgA, and IgM coupled to HRP (Abcam,  
183 cat. ab102420) were added at 1:8000 dilution and incubated for 1 h at 37 °C. Fifty  
184 µl/ well of TMB (Abcam, cat. ab171523) were then incubated 2 min. The reaction  
185 was stopped with 50 µl of 0.2 M H<sub>2</sub>SO<sub>4</sub>, and plates were read at 450 nm on a  
186 spectrophotometer (Tecan's Magellan® universal reader). Quantitative standard  
187 curves were obtained for each isotype using serial dilutions from recombinant  
188 human IgA (Abcam, cat. ab91025), IgG (Abcam, cat. Ab91102) or IgM (Abcam,  
189 cat. Ab91117).

190

## 191 **2.6 IgM, IgG, and IgA-secreting cells ELISPOT**

192 Briefly, 96-well plates were covered with PVDF membranes. After methanol  
193 activation, membranes were coated with a 1:2500 dilution of mouse anti-human  
194 monoclonal antibody recognizing IgM, IgA, or IgG (Abcam, cats. ab200541,  
195 ab7400, ab72528, respectively). The plates were incubated for 12 h at 4° C, then  
196 blocked for 90 min at 25 °C. Colostrum-enriched cells or blood PBMC were seeded  
197 at 200,000 cells/well in RPMI 1640 with 10% FBS and 100 U/ml penicillin, 0.1  
198 mg/ml streptomycin. Plates were incubated for 18 h at 37 °C and 5% of CO<sub>2</sub>. For  
199 detection, a 1:10,000 dilution of HRP-conjugated goat anti-human IgG, IgA, and  
200 IgM (Abcam, cat. ab102420) was incubated 1 h at 37°C. Finally, 50 µl/well 3,3'-  
201 DAB (Sigma-Aldrich, cat. D4418) were added. Membranes were then washed and  
202 dried, and pictures were acquired with a Stereoscopic Microscope (Nikon, cat.  
203 SMZ1500). Spots were counted using the Analyze Particles command in ImageJ  
204 (Java®).

205

## 206 **2.7 Colostrum-mediated macrophage cytokine production**

207 To produce human macrophage-like cells, U937 cells (ATCC, CRL-1593.2) were  
208 differentiated over 24 h using 10 ng/ml PMA (Sigma-Aldrich®, cat. 79346) in RPMI  
209 1640, supplemented as above. After 24 h, the media was replaced without PMA  
210 but including 2.5% 0.22 µm-filtered colostrum supernatant. After a further 24 h,  
211 cells were washed, fresh media without colostrum was added. To quantify

212 cytokines, 5  $\mu$ L of culture supernatants were obtained every 2 h for a total of 16 h.  
213 Samples were centrifuged and stored at -20 °C until quantification. Cytokines were  
214 quantified using a LEGENDplex kit (BioLegend, cat. 740808) according to the  
215 manufacturer's instructions. All samples were immediately read on a BD®  
216 FACSCelesta flow cytometer fitted with 405 nm, 488 nm, and 633 nm lasers and  
217 operated through the BD® FACSDiva software version 8. Analysis and quantitative  
218 data were obtain using the FCAP Array software v 3.0 SoftFlow® LEGENDplex™  
219 Cloud-based Data Analysis Software online<sup>23</sup>.

220

## 221 **2. 8 Statistical Analysis**

222 Shapiro-Wilk normality tests were performed on each B lymphocyte subtype  
223 dataset. Non-normal datasets were compared using Mann-Whitney or one-way  
224 Kruskal-Wallis test when comparing >2 groups. Means of normally distributed data  
225 were compared using Student's t test. Correlations were investigated using  
226 Pearson rank or Spearman r. All these tests were performed in GraphPad Prism  
227 v.8 (GraphPad Software Inc®, San Diego CA, USA). Median (IQR) were compared  
228 using Independent-Samples Median test in SPSS v.26.

229

## 230 **3. RESULTS AND DISCUSSION**

231

### 232 **3.1 B lymphocytes subpopulations are selectively present in colostrum**

233 We recruited a total of 48 mothers to participate in this study. As per study design,  
234 the BMI and BF% of the cohort of mothers with obesity were significantly larger  
235 compared to the cohort of "lean" mothers, while no difference were observed in  
236 possible confounders such as maternal age, infant gender, gestational age, or  
237 delivery type between the groups (Table 1).

238 We applied an optimized 10-colour flow cytometry panel to detect 18  
239 subpopulations of B lymphocytes in peripheral blood and colostrum. The gating  
240 strategy was based on classical and more recent markers used to subtype  
241 peripheral blood B lymphocytes (Table 2). We found a reduced fraction of the total  
242 B lymphocytes population in obese colostrum compared to the lean cohort



243 (Supplementary Fig. 2), consistent with previous findings<sup>13</sup>. The reduction was not  
244 resumed in peripheral blood, suggesting that obesity regulates this compartment  
245 locally, with observed changes in colostrum.

246

247 In peripheral blood, we could detect all targeted subpopulations including rare  
248 subtypes like B<sub>reg</sub>-like and transitional B cells (Supplementary Fig. 3) with  
249 proportions consistent with previous reports<sup>22,24–26</sup>. In contrast, in colostrum  
250 multiple subtypes could not be detected, notably the early stages of B cell  
251 ontogeny including transitional and naïve B cells (Fig. 1A). In comparing B  
252 lymphocyte subtypes between blood and colostrum, we considered relative  
253 proportions (Supplementary Fig. 3), but also concentrations in original samples  
254 (Fig. 1) calculated from measured sample volumes, manual cell counts and %  
255 populations, to account for discrepancies in cellularity between blood and  
256 colostrum (Fig. 1). Differences were consistent between population % and  
257 concentrations. While early ontogeny B cells were absent from colostrum,  
258 differentiated subtypes were very significantly increased in this tissue, including  
259 B<sub>reg</sub>-like, DN2-like and plasma-like cells that were rare in peripheral blood (Fig. 1B),  
260 although definitive labelling should be based on functional assays such as cytokine  
261 and antibody production. While switched memory (SwM) B cells were present in  
262 similar concentrations in both colostrum and blood, unswitched memory B cells  
263 (USwM) were significantly underrepresented in colostrum compared to peripheral  
264 blood (Fig. 1C). Overall, the results describe pervasive, significant differences in %  
265 and concentrations of B lymphocyte subtypes between blood and colostrum. This  
266 may suggest a selective migration to the mammary acini and colostrum. It further  
267 describes human colostrum as containing multiple subpopulations of differentiated  
268 B cells, enriching the current state-of-the-art<sup>27,28</sup>.

269

270 We then asked if proportions of specific B cell subpopulations in colostrum were  
271 regulated with maternal obesity. In this context, we measured significantly less  
272 USwM B cells without detected changes in the SwM B cells (Fig. 1C). While this  
273 work is the first to report changes in breastmilk memory B cells in relation with

274 maternal obesity, others have measured increased breastmilk SwM B cells from  
275 HIV-infected mothers<sup>28</sup>. Increased SwM B cells were also found in mouse visceral  
276 adipose tissue<sup>29</sup>. IgG isotype switching follows stimulation with cytokines that are  
277 increased in obesity<sup>29,30</sup>. We propose that the increase in SwM B cells depletes  
278 USwM, causing the significant decrease in colostrum USwM B cells. In support of  
279 this, obesity peripheral blood indeed contained significantly less USwM and  
280 significantly more SwM B lymphocytes (data not shown).

281

### 282 **3.2 Obesity colostrum harbors a dysregulated B lymphocyte repertoire,** 283 **hinting towards an inflammatory profile**

284 Looking at functional populations, we found a significantly reduced B<sub>reg</sub>-like cell  
285 fraction in the colostrum of mothers with obesity (Fig. 2A). The relative abundance  
286 of colostrum B<sub>reg</sub>-like cells negatively correlated with maternal pre-pregnancy BMI  
287 and current BF%. Inflammation has been linked to decreased B<sub>reg</sub>-like cells  
288 functions and growth<sup>31,32</sup>. Obesity is now accepted as a state of chronic  
289 inflammation, which supports the physiological interpretation of the results<sup>33,34</sup>. B<sub>reg</sub>  
290 cells limit ongoing immune reactions, restore immune homeostasis, and promote  
291 tolerance to commensals of the gut microbiota, suggesting consequences of this  
292 reduction for the infant's pioneering microbiota<sup>35-38</sup>. We then investigated DN2-like  
293 B cells, recently described in blood in multiple inflammatory scenarios including  
294 autoimmune disorders, acute infections and obesity<sup>22,15,39</sup>. Consistent with the  
295 inflammatory state suggested by a reduced B<sub>reg</sub>-like B cell fraction, we found  
296 significantly increased proportions of DN2-like cells, and these changes positively  
297 correlated with pre-pregnancy BMI and current BF% (Fig. 2B). While the exact  
298 origins and roles of DN2-like cells remain unclear to date, their occurrence follow a  
299 proinflammatory stimulus<sup>40-43</sup>. Future experiments could include measuring the  
300 transcription factor T-bet and IFN $\gamma$  production from these cells to confirm cell  
301 identity<sup>44-46</sup>. We then investigated plasma-like cells that could be producing  
302 antibodies. These were increased in obesity colostrum, and as observed with DN2-  
303 like B cells, colostrum plasma-like cell proportions positively correlated with pre-  
304 pregnancy BMI and with current BF% (Fig. 2C). Plasma cells can differentiate

305 following IFN $\gamma$ <sup>47</sup> and leptin signaling<sup>48</sup>. These soluble factors are increased in  
306 obesity<sup>49</sup>, which provides a physiological explanation for our findings.

307

308 Correlation values ( $r^2$ ) for the 3 cell types were consistently higher for BF%  
309 compared to BMI. Despite the historical use of BMI as an indicator of obesity, the  
310 lack of precision in the composition of the measured weight is confounding. Our  
311 results suggest a clearer association between increased BF% and the regulation of  
312 specific B cell subtypes in human colostrum.

313

### 314 **3.3 Obesity modulates colostrum plasma like-cells and their antibody** 315 **secreting function**

316 Having identified a significant increase in colostrum plasma-like B cells, we  
317 wondered if this population exhibited changes in their antibody production,  
318 isotypes, and antigen specificity. As B cells gradually lose CD19 surface  
319 expression during differentiation towards antibody-secreting cells, we measured  
320 CD19 MFI within the plasma-like cell subpopulations in both groups to compare  
321 their relative degree of maturity<sup>50</sup>. We identified 3 discrete subpopulations based  
322 on CD19 expression level, with a significant increase in the CD19<sup>low</sup> plasma-like B  
323 cell fraction in the obese cohort (Supplementary Fig. 4)<sup>51</sup>. This suggests obese  
324 colostrum is enriched in plasma-like cells maturing towards antibody-secreting  
325 cells, possibly driven by proinflammatory signals linked to obesity as described  
326 earlier<sup>47,48</sup>.

327

328 We compared isotypes of the plasma-like cells and evidenced a significantly  
329 increased fraction of IgG<sup>+</sup> plasma-like cells in obese colostrum, while the IgA<sup>+</sup>  
330 fraction remained unchanged (Fig. 3A). Interestingly, intra-individual correlations of  
331 IgA<sup>+</sup>- and IgG<sup>+</sup>-plasma-like cells exhibited a trend whereby obese colostrum  
332 contained a switched relation of both isotypes (Fig. 3B), suggesting a  
333 compensatory mechanism although more work is required to mechanistically  
334 explain this. We then investigated if there were more antibody-secreting cells in  
335 obese colostrum. Using an ELISPOT assay, we found a significant increase in IgG-

336 secreting cells in obese colostrum which positively correlated with maternal BMI  
337 and BF% (Fig. 3C). While IgA-secreting cell concentrations remained unchanged,  
338 we observed a negative correlation between their concentration, and maternal BMI  
339 and BF%. These results confirm colostrum contains B cell subsets that actively  
340 produce antibodies *in situ*, adding to the current understanding of breastmilk IgG  
341 originating from FcN-mediated transcellular translocation<sup>52</sup>. We measured  
342 significantly more sIgG and less sIgA concentrations in obese colostrum (Fig. 3D).  
343 These changes may affect the establishment of the intestinal microbiota<sup>53</sup>.  
344 Dysregulations in maternal antibodies received through breastmilk also impact the  
345 growth and maturation of the neonatal intestine<sup>54</sup>. These results confirm previous  
346 reports of increased local concentrations of IgG in obesity<sup>55</sup>. We further wondered  
347 if the increased IgG may be autoimmune, as accumulating evidence links obesity  
348 to autoimmune disorders<sup>56</sup>. We measured the concentration of colostrum IgG  
349 specifically recognizing N-acetylglucosamine (GlcNAc), a common bacterial and  
350 fungal antigen that bears similarities with circulating hyaluronic acid in obesity<sup>57,58</sup>.  
351 We found a very significant increase of anti-GlcNAc IgG in obese colostrum (Fig.  
352 3D). The GlcNAc used as target antigen in the assay was obtained from Group A  
353 *Streptococcus pyogenes* (GAS), however the incidence GAS infection is low  
354 among pregnant mothers from low income countries like Mexico<sup>59</sup>, and no  
355 participant reported GAS infection during pregnancy. These results then suggest  
356 autoreactive anti-GlcNAc IgG in obese colostrum, and it will be important to  
357 investigate how this affects neonatal gut health.

358

### 359 **3.4 Obese colostrum IgG may originate from proinflammatory DN2 B** 360 **lymphocytes**

361 We then wondered what cells could produce IgG in obese colostrum. We noticed  
362 DN2-like cells were almost entirely IgG<sup>+</sup> (Fig. 4A), and these cells have been  
363 reported to secrete IgG<sup>40</sup>. Since obese colostrum contained significantly more IgG<sup>+</sup>  
364 DN2-like and IgG<sup>+</sup> plasma-like cells, together with more sIgG (Fig. 3C) and IgG-  
365 secreting cells (Fig. 3A), we correlated IgG concentrations with these possible local  
366 producers. There were clear correlations between IgG colostrum concentrations

367 and both IgG<sup>+</sup> cell types in obesity but not in the lean cohort (Fig. 4B, gray and red  
368 data, respectively). Looking at IgG-producing cells, the only significant correlation  
369 was with the proportion of DN2-like cells, in obese colostrum only (Fig. 4C, gray  
370 data), suggesting these cells participate in the production of IgG in this context. As  
371 DN2 cells are mostly found in a proinflammatory setting<sup>15,40,60</sup>, it will be relevant to  
372 investigate the IgG subtypes produced and their consequence *in vivo*.

373

### 374 **3.5 Obese colostrum activates human macrophages *in vitro***

375 We finally investigated the effect of obese colostrum on human macrophages.  
376 Macrophages reside in the neonatal intestine and regulate the local inflammatory  
377 response during the first days of life<sup>61</sup>. Co-cultures evidenced that colostrum from  
378 mothers with obesity prompted TNF- $\alpha$  production while colostrum from lean  
379 mothers did not (Fig. 5A). Until shortly after birth, the neonatal intestine contains  
380 macrophages replenished by blood monocytes due to commensal stimulation. In  
381 health, these intestinal macrophages show low pro-inflammatory responses,  
382 including minimal IL-6 and TNF- $\alpha$  expression<sup>62-66</sup>. Elevated TNF- $\alpha$  levels in the  
383 neonatal intestine increases NEC pathogenesis<sup>67</sup>. On the other hand, while IL-6  
384 was significantly increased by obese colostrum stimulation, this cytokine was  
385 already present in basal conditions (Fig. 5B). Overall, there was a direct induction  
386 of inflammation of macrophages by obese colostrum. Further research should  
387 investigate activation mechanisms and long-term consequences for neonatal  
388 health.

389

## 390 **4. Conclusions**

391 This is the first report of obesity-mediated regulation of B lymphocytes and  
392 antibodies in human colostrum. We measured notable changes in phenotypically  
393 and functionally distinct B lymphocyte subpopulations, which in turn adversely  
394 affect the composition of antibodies (summarized in Fig. 6). We advocate for  
395 additional research to explore the underlying mechanisms in maternal gut and  
396 breast tissue affected by obesity, as well as to understand the ramifications for

397 neonatal intestinal maturation, including the establishment of gut microbiota and  
398 maturation of the intestine in suckling infants.

399

## 400 **References**

- 401 1. Shen, Z.-H. *et al.* Relationship between intestinal microbiota and ulcerative colitis:  
402 Mechanisms and clinical application of probiotics and fecal microbiota transplantation. *WJG*  
403 **24**, 5–14 (2018).
- 404 2. Lyu, M. *et al.* ILC3s select microbiota-specific regulatory T cells to establish tolerance in the  
405 gut. *Nature* **610**, 744–751 (2022).
- 406 3. Ramanan, D. *et al.* An Immunologic Mode of Multigenerational Transmission Governs a Gut  
407 Treg Setpoint. *Cell* **181**, 1276-1290.e13 (2020).
- 408 4. Brodin, P. Immune-microbe interactions early in life: A determinant of health and disease long  
409 term. *Science* **376**, 945–950 (2022).
- 410 5. Gámez-Valdez, J. S. *et al.* Differential analysis of the bacterial community in colostrum samples  
411 from women with gestational diabetes mellitus and obesity. *Sci Rep* **11**, 24373 (2021).
- 412 6. Azad, M. B. *et al.* 'Human Milk Oligosaccharide Concentrations Are Associated with Multiple  
413 Fixed and Modifiable Maternal Characteristics, Environmental Factors, and Feeding Practices.  
414 *The Journal of Nutrition* **148**, 1733–1742 (2018).
- 415 7. Ellsworth, L. *et al.* Impact of maternal overweight and obesity on milk composition and infant  
416 growth. *Matern Child Nutr* **16**, (2020).
- 417 8. Daniel, A. I. *et al.* Maternal BMI is positively associated with human milk fat: a systematic  
418 review and meta-regression analysis. *The American Journal of Clinical Nutrition* **113**, 1009–  
419 1022 (2021).

- 420 9. Collado, M. C., Laitinen, K., Salminen, S. & Isolauri, E. Maternal weight and excessive weight  
421 gain during pregnancy modify the immunomodulatory potential of breast milk. *Pediatr Res* **72**,  
422 77–85 (2012).
- 423 10. Fujimori, M. *et al.* Cytokine and adipokine are biofactors can act in blood and colostrum of  
424 obese mothers: Cytokine and adipokine in maternal obesity. *BioFactors* **43**, 243–250 (2017).
- 425 11. Leghi, G. *et al.* The Impact of Maternal Obesity on Human Milk Macronutrient Composition: A  
426 Systematic Review and Meta-Analysis. *Nutrients* **12**, 934 (2020).
- 427 12. Erliana, U. D. & Fly, A. D. The Function and Alteration of Immunological Properties in Human  
428 Milk of Obese Mothers. *Nutrients* **11**, 1284 (2019).
- 429 13. Piñeiro-Salvador, R. *et al.* A cross-sectional study evidences regulations of leukocytes in the  
430 colostrum of mothers with obesity. *BMC Med* **20**, 388 (2022).
- 431 14. Colonna-Romano, G. *et al.* A double-negative (IgD–CD27–) B cell population is increased in the  
432 peripheral blood of elderly people. *Mechanisms of Ageing and Development* **130**, 681–690  
433 (2009).
- 434 15. Frasca, D., Diaz, A., Romero, M. & Blomberg, B. B. Phenotypic and Functional Characterization  
435 of Double Negative B Cells in the Blood of Individuals With Obesity. *Front. Immunol.* **12**,  
436 616650 (2021).
- 437 16. Brouwer, S. *et al.* Pathogenesis, epidemiology and control of Group A Streptococcus infection.  
438 *Nat Rev Microbiol* **21**, 431–447 (2023).
- 439 17. Aruffo, A., Stamenkovic, I., Melnick, M., Underhill, C. B. & Seed, B. CD44 is the principal cell  
440 surface receptor for hyaluronate. *Cell* **61**, 1303–1313 (1990).
- 441 18. Cywes, C. & Wessels, M. R. Group A Streptococcus tissue invasion by CD44-mediated cell  
442 signalling. *Nature* **414**, 648–652 (2001).

- 443 19. Trend, S. *et al.* Leukocyte Populations in Human Preterm and Term Breast Milk Identified by  
444 Multicolour Flow Cytometry. *PLoS ONE* **10**, e0135580 (2015).
- 445 20. Whyte, C. E., Tumes, D. J., Liston, A. & Burton, O. T. Do more with Less: Improving High  
446 Parameter Cytometry Through Overnight Staining. *Current Protocols* **2**, (2022).
- 447 21. Cervantes-Díaz, R. *et al.* Circulating B10 regulatory cells are decreased in severe and critical  
448 COVID-19. *Journal of Leukocyte Biology* **112**, 333–337 (2022).
- 449 22. Sosa-Hernández, V. A. *et al.* B Cell Subsets as Severity-Associated Signatures in COVID-19  
450 Patients. *Front. Immunol.* **11**, 611004 (2020).
- 451 23. Qognit. <https://legendplex.qognit.com/user/login?next=home>.
- 452 24. Appelgren, D. *et al.* Regulatory B cells are reduced in the blood in patients with  
453 granulomatosis with polyangiitis, and fail to regulate T-cell IFN- $\gamma$  production. *Clin Exp Immunol*  
454 **213**, 190–201 (2023).
- 455 25. Zaimoku, Y. *et al.* Deficit of circulating CD19<sup>+</sup>CD24<sup>hi</sup>CD38<sup>hi</sup> regulatory B cells in severe  
456 aplastic anaemia. *Br J Haematol* **190**, 610–617 (2020).
- 457 26. Lima, J. *et al.* Characterization of B cells in healthy pregnant women from late pregnancy to  
458 post-partum: a prospective observational study. *BMC Pregnancy and Childbirth* **16**, 139  
459 (2016).
- 460 27. Peroni, D. G. *et al.* Colostrum-derived B and T cells as an extra-lymphoid compartment of  
461 effector cell populations in humans. *The Journal of Maternal-Fetal & Neonatal Medicine* **26**,  
462 137–142 (2013).
- 463 28. Tuaille, E. *et al.* Human Milk-Derived B Cells: A Highly Activated Switched Memory Cell  
464 Population Primed to Secrete Antibodies. *J Immunol* **182**, 7155–7162 (2009).
- 465 29. Winer, D. A. *et al.* B cells promote insulin resistance through modulation of T cells and  
466 production of pathogenic IgG antibodies. *Nat Med* **17**, 610–617 (2011).



- 467 30. O'Rourke, R. W. *et al.* Depot-specific differences in inflammatory mediators and a role for NK  
468 cells and IFN-gamma in inflammation in human adipose tissue. *Int J Obes (Lond)* **33**, 978–990  
469 (2009).
- 470 31. Tedder, T. F. B10 Cells: A Functionally Defined Regulatory B Cell Subset. *The Journal of*  
471 *Immunology* **194**, 1395–1401 (2015).
- 472 32. Nishimura, S. *et al.* Adipose Natural Regulatory B Cells Negatively Control Adipose Tissue  
473 Inflammation. *Cell Metabolism* **18**, 759–766 (2013).
- 474 33. Ellulu, M. S., Patimah, I., Khaza'ai, H., Rahmat, A. & Abed, Y. Obesity and inflammation: the  
475 linking mechanism and the complications. *aoms* **4**, 851–863 (2017).
- 476 34. Rohm, T. V., Meier, D. T., Olefsky, J. M. & Donath, M. Y. Inflammation in obesity, diabetes, and  
477 related disorders. *Immunity* **55**, 31–55 (2022).
- 478 35. Strom, A. *et al.* B regulatory cells are increased in hypercholesterolaemic mice and protect  
479 from lesion development via IL-10. *Thromb Haemost* **114**, 835–847 (2015).
- 480 36. Mercadante, A. C. T. *et al.* Oral combined therapy with probiotics and alloantigen induces B  
481 cell-dependent long-lasting specific tolerance. *J Immunol* **192**, 1928–1937 (2014).
- 482 37. Rosser, E. C. *et al.* Microbiota-Derived Metabolites Suppress Arthritis by Amplifying Aryl-  
483 Hydrocarbon Receptor Activation in Regulatory B Cells. *Cell Metabolism* **31**, 837-851.e10  
484 (2020).
- 485 38. Rosser, E. C. *et al.* Regulatory B cells are induced by gut microbiota-driven interleukin-1 $\beta$  and  
486 interleukin-6 production. *Nat Med* **20**, 1334–1339 (2014).
- 487 39. Machann, J. *et al.* Age and gender related effects on adipose tissue compartments of subjects  
488 with increased risk for type 2 diabetes: a whole body MRI / MRS study. *MAGMA* **18**, 128–137  
489 (2005).

- 490 40. Jenks, S. A. *et al.* Distinct Effector B Cells Induced by Unregulated Toll-like Receptor 7  
491 Contribute to Pathogenic Responses in Systemic Lupus Erythematosus. *Immunity* **49**, 725-  
492 739.e6 (2018).
- 493 41. Woodruff, M. C. *et al.* Extrafollicular B cell responses correlate with neutralizing antibodies  
494 and morbidity in COVID-19. *Nat Immunol* **21**, 1506–1516 (2020).
- 495 42. Stewart, A. *et al.* Single-Cell Transcriptomic Analyses Define Distinct Peripheral B Cell Subsets  
496 and Discrete Development Pathways. *Front. Immunol.* **12**, 602539 (2021).
- 497 43. Winer, D. A., Winer, S., Chng, M. H. Y., Shen, L. & Engleman, E. G. B Lymphocytes in obesity-  
498 related adipose tissue inflammation and insulin resistance. *Cell. Mol. Life Sci.* **71**, 1033–1043  
499 (2014).
- 500 44. Scharer, C. D. *et al.* Epigenetic programming underpins B cell dysfunction in human SLE. *Nat*  
501 *Immunol* **20**, 1071–1082 (2019).
- 502 45. Stone, S. L. *et al.* T-bet transcription factor promotes antibody secreting cell differentiation by  
503 limiting the inflammatory effects of IFN $\gamma$  on B cells. *Immunity* **50**, 1172-1187.e7 (2019).
- 504 46. Zumaquero, E. *et al.* IFN $\gamma$  induces epigenetic programming of human T-bethi B cells and  
505 promotes TLR7/8 and IL-21 induced differentiation. *eLife* **8**, e41641 (2019).
- 506 47. Peng, S. L., Szabo, S. J. & Glimcher, L. H. T-bet regulates IgG class switching and pathogenic  
507 autoantibody production. *Proc. Natl. Acad. Sci. U.S.A.* **99**, 5545–5550 (2002).
- 508 48. Crouch, M., Al-Shaer, A. & Shaikh, S. R. Hormonal Dysregulation and Unbalanced Specialized  
509 Pro-Resolving Mediator Biosynthesis Contribute toward Impaired B Cell Outcomes in Obesity.  
510 *Mol. Nutr. Food Res.* **65**, 1900924 (2021).
- 511 49. Muskiet, F., Carrera-Bastos, P., Pruijboom, L., Lucia, A. & Furman, D. Obesity and Leptin  
512 Resistance in the Regulation of the Type I Interferon Early Response and the Increased Risk for  
513 Severe COVID-19. *Nutrients* **14**, 1388 (2022).

- 514 50. Sanz, I. *et al.* Challenges and Opportunities for Consistent Classification of Human B Cell and  
515 Plasma Cell Populations. *Front. Immunol.* **10**, 2458 (2019).
- 516 51. Arumugakani, G. *et al.* Early Emergence of CD19-Negative Human Antibody-Secreting Cells at  
517 the Plasmablast to Plasma Cell Transition. *The Journal of Immunology* **198**, 4618–4628 (2017).
- 518 52. Pullen, K. M. *et al.* Selective functional antibody transfer into the breastmilk after SARS-CoV-2  
519 infection. *Cell Reports* **37**, 109959 (2021).
- 520 53. Pabst, O. & Slack, E. IgA and the intestinal microbiota: the importance of being specific.  
521 *Mucosal Immunol* **13**, 12–21 (2020).
- 522 54. Koch, M. A. *et al.* Maternal IgG and IgA Antibodies Dampen Mucosal T Helper Cell Responses  
523 in Early Life. *Cell* **165**, 827–841 (2016).
- 524 55. van Dam, A. D. *et al.* IgG is elevated in obese white adipose tissue but does not induce glucose  
525 intolerance via Fcγ-receptor or complement. *Int J Obes (Lond)* **42**, 260–269 (2018).
- 526 56. Frasca, D., Diaz, A., Romero, M., Thaller, S. & Blomberg, B. B. Secretion of autoimmune  
527 antibodies in the human subcutaneous adipose tissue. *PLoS One* **13**, e0197472 (2018).
- 528 57. Petrus, P. *et al.* Glutamine Links Obesity to Inflammation in Human White Adipose Tissue. *Cell*  
529 *Metabolism* **31**, 375-390.e11 (2020).
- 530 58. Romo, M. *et al.* Small fragments of hyaluronan are increased in individuals with obesity and  
531 contribute to low-grade inflammation through TLR-mediated activation of innate immune  
532 cells. *Int J Obes* **46**, 1960–1969 (2022).
- 533 59. Sherwood, E. *et al.* Invasive group A streptococcal disease in pregnant women and young  
534 children: a systematic review and meta-analysis. *The Lancet Infectious Diseases* **22**, 1076–1088  
535 (2022).
- 536 60. Elsner, R. A. & Shlomchik, M. J. Germinal Center and Extrafollicular B Cell Responses in  
537 Vaccination, Immunity, and Autoimmunity. *Immunity* **53**, 1136–1150 (2020).

- 538 61. Emami, C. N., Mittal, R., Wang, L., Ford, H. R. & Prasadarao, N. V. Role of Neutrophils and  
539 Macrophages in the Pathogenesis of Necrotizing Enterocolitis Caused by Cronobacter  
540 sakazakii. *Journal of Surgical Research* **172**, 18–28 (2012).
- 541 62. Shaw, T. N. *et al.* Tissue-resident macrophages in the intestine are long lived and defined by  
542 Tim-4 and CD4 expression. *J Exp Med* **215**, 1507–1518 (2018).
- 543 63. Weber, B., Saurer, L., Schenk, M., Dickgreber, N. & Mueller, C. CX3CR1 defines functionally  
544 distinct intestinal mononuclear phagocyte subsets which maintain their respective functions  
545 during homeostatic and inflammatory conditions. *Eur J Immunol* **41**, 773–779 (2011).
- 546 64. Smith, P. D. *et al.* Intestinal macrophages lack CD14 and CD89 and consequently are down-  
547 regulated for LPS- and IgA-mediated activities. *J Immunol* **167**, 2651–2656 (2001).
- 548 65. Rivollier, A., He, J., Kole, A., Valatas, V. & Kelsall, B. L. Inflammation switches the  
549 differentiation program of Ly6Chi monocytes from antiinflammatory macrophages to  
550 inflammatory dendritic cells in the colon. *J Exp Med* **209**, 139–155 (2012).
- 551 66. Smythies, L. E. *et al.* Human intestinal macrophages display profound inflammatory anergy  
552 despite avid phagocytic and bacteriocidal activity. *J Clin Invest* **115**, 66–75 (2005).
- 553 67. Halpern, M. D. *et al.* Reduction of experimental necrotizing enterocolitis with anti-TNF- $\alpha$ .  
554 *American Journal of Physiology-Gastrointestinal and Liver Physiology* **290**, G757–G764 (2006).
- 555 68. Sims, G. P. *et al.* Identification and characterization of circulating human transitional B cells.  
556 *Blood* **105**, 4390–4398 (2005).
- 557 69. Suryani, S. *et al.* Differential expression of CD21 identifies developmentally and functionally  
558 distinct subsets of human transitional B cells. *Blood* **115**, 519–529 (2010).
- 559 70. Palanichamy, A. *et al.* Novel Human Transitional B Cell Populations Revealed by B Cell  
560 Depletion Therapy<sup>1</sup>. *The Journal of Immunology* **182**, 5982–5993 (2009).

- 561 71. Quách, T. D. *et al.* Anergic Responses Characterize a Large Fraction of Human Autoreactive  
562 Naive B Cells Expressing Low Levels of Surface IgM. *The Journal of Immunology* **186**, 4640–  
563 4648 (2011).
- 564 72. Golinski, M.-L. *et al.* CD11c+ B Cells Are Mainly Memory Cells, Precursors of Antibody  
565 Secreting Cells in Healthy Donors. *Frontiers in Immunology* **11**, (2020).
- 566 73. Jenks, S. A., Cashman, K. S., Woodruff, M. C., Lee, F. E.-H. & Sanz, I. Extrafollicular responses in  
567 humans and SLE. *Immunological Reviews* **288**, 136–148 (2019).
- 568 74. Shapiro-Shelef, M. *et al.* Blimp-1 Is Required for the Formation of Immunoglobulin Secreting  
569 Plasma Cells and Pre-Plasma Memory B Cells. *Immunity* **19**, 607–620 (2003).
- 570 75. Nutt, S. L., Hodgkin, P. D., Tarlinton, D. M. & Corcoran, L. M. The generation of antibody-  
571 secreting plasma cells. *Nat Rev Immunol* **15**, 160–171 (2015).
- 572 76. Bagnara, D. *et al.* A Reassessment of IgM Memory Subsets in Humans. *The Journal of*  
573 *Immunology* **195**, 3716–3724 (2015).
- 574 77. Grimsholm, O. CD27 on human memory B cells—more than just a surface marker. *Clinical and*  
575 *Experimental Immunology* **213**, 164–172 (2023).
- 576 78. Saunders, S. P., Ma, E. G. M., Aranda, C. J. & Curotto de Lafaille, M. A. Non-classical B Cell  
577 Memory of Allergic IgE Responses. *Frontiers in Immunology* **10**, (2019).
- 578 79. Sutton, H. J. *et al.* Atypical B cells are part of an alternative lineage of B cells that participates  
579 in responses to vaccination and infection in humans. *Cell Reports* **34**, 108684 (2021).
- 580 80. Wang, S. *et al.* IL-21 drives expansion and plasma cell differentiation of autoreactive  
581 CD11chiT-bet+ B cells in SLE. *Nat Commun* **9**, 1758 (2018).
- 582 81. CD19+CD24hiCD38hi B Cells Exhibit Regulatory Capacity in Healthy Individuals but Are  
583 Functionally Impaired in Systemic Lupus Erythematosus Patients: Immunity.  
584 [https://www.cell.com/immunity/fulltext/S1074-7613\(09\)00547-](https://www.cell.com/immunity/fulltext/S1074-7613(09)00547-)

585 0?\_returnURL=https%3A%2F%2Flinkinghub.elsevier.com%2Fretrieve%2Fpii%2FS10747613090

586 05470%3Fshowall%3Dtrue.

587 82. Mauri, C. & Menon, M. Human regulatory B cells in health and disease: therapeutic potential.

588 *J Clin Invest* **127**, 772–779 (2017).

589

## 590 **AUTHOR CONTRIBUTIONS**

591 All authors approved the final version of the manuscript. ESS designed and  
592 performed experiments, analyzed data and wrote, edited, and reviewed the  
593 manuscript. DBR performed experiments, analyzed data and reviewed the  
594 manuscript. MRAG, VJLD and CNLV, designed experiments, enrolled participants,  
595 collected samples, edited, and reviewed the manuscript. MEGB designed the  
596 study, analyzed data, wrote, edited, and reviewed the manuscript.

597

## 598 **DECLARATION OF COMPETING INTEREST**

599 The authors declare no conflict of interest.

600

## 601 **FUNDING**

602 This research was supported by the Institute for Obesity Research and the Centro  
603 de Biotecnología FEMSA of Tecnológico de Monterrey, and sponsored by  
604 StrainBiotech SAPI de CV.

605

## 606 **DATA AVAILABILITY**

607 All .fcs3 files obtained as part of this work will be made freely available on  
608 FlowRepository upon paper acceptance (in process)

609

## 610 **ACKNOWLEDGEMENTS**

611 We acknowledge institutional support in all administrative processes involved with  
612 a clinical study. We are deeply grateful to participating families.

613

614 Table 1: Participants characteristics

| Variable                              | Group        |               |               |               | P value |
|---------------------------------------|--------------|---------------|---------------|---------------|---------|
|                                       | Lean, n = 23 |               | Obese, n = 25 |               |         |
| Maternal age (years) <sup>a</sup>     | 21           | (20 - 24)     | 23.5          | (20 -27.5)    | 0.099   |
| BMI (kg/m <sup>2</sup> ) <sup>a</sup> | 21.4         | (18.7 - 24.1) | 30.3          | (30.0 - 31.9) | <0.0001 |
| Body fat percentage (%) <sup>a</sup>  | 20           | (15 - 22)     | 39.1          | (34 - 42)     | <0.0001 |
| Gestational age (weeks) <sup>a</sup>  | 38           | (37 - 39)     | 38            | (37 - 39)     | 0.690   |
| Primiparity <sup>a</sup>              | 2            | (1 - 3)       | 3             | (1.75 - 4)    | 0.104   |
| Vaginal delivery <sup>b</sup>         | 23           | (100)         | 24            | (92.3)        | 0.491   |
| Newborn female gender <sup>b</sup>    | 9            | (39.1)        | 15            | (60)          | 0.156   |
| Newborn male gender <sup>b</sup>      | 14           | (60.9)        | 10            | (40)          |         |
| Birth weight (g) <sup>a</sup>         | 3070         | (2700 - 3290) | 3000          | (2742 - 3255) | 0.411   |
| Birth height (cm) <sup>a</sup>        | 49           | (47 - 50)     | 49            | (47 - 50)     | 0.832   |

615

616 Notes: BMI = Body Mass Index; a = Values expressed as median (IQR), statistical  
 617 analysis with Independent-Samples Median test, b = Values expresses as  
 618 frequency (%), statistical analysis with Fisher's exact test.

619

620 Table 2: Flow cytometry-based identification of B lymphocyte subtypes

| B cell subpopulation (acronym)   | Surface markers phenotype                                                                                                | References |
|----------------------------------|--------------------------------------------------------------------------------------------------------------------------|------------|
| Total B cells (B cells)          | CD19 <sup>+</sup>                                                                                                        | 27         |
| Transitional B cells type 1 (T1) | CD19 <sup>+</sup> , CD27 <sup>-</sup> , CD38 <sup>hi</sup> ,<br>CD24 <sup>hi</sup> , CD21 <sup>neg/low</sup>             | 68,69      |
| Transitional B cells type 2 (T2) | CD19 <sup>+</sup> , CD27 <sup>-</sup> , CD38 <sup>hi</sup> ,<br>CD24 <sup>hi</sup> , CD21 <sup>+</sup>                   | 69,70      |
| Resting naïve B cells (resN)     | CD19 <sup>+</sup> , CD27 <sup>-</sup> , IgD <sup>+</sup> , CD38 <sup>+</sup> ,<br>CD24 <sup>-</sup> , CD11c <sup>-</sup> | 71,72      |

|                                                                                |                                                                                                                                             |       |
|--------------------------------------------------------------------------------|---------------------------------------------------------------------------------------------------------------------------------------------|-------|
| Active naïve B cells ( <b>actN</b> )                                           | CD19 <sup>+</sup> , CD27 <sup>-</sup> , IgD <sup>+</sup> , CD38 <sup>+</sup> , CD24 <sup>-</sup> , CD11c <sup>+</sup>                       | 72,73 |
| Total plasma-like cells ( <b>Plasma-like cells</b> )                           | CD19 <sup>+</sup> , CD27 <sup>hi</sup> , CD38 <sup>hi</sup>                                                                                 | 74,75 |
| Plasma-like cells expressing IgA ( <b>IgA<sup>+</sup> plasma-like cells</b> )  | CD19 <sup>+</sup> , CD27 <sup>hi</sup> , CD38 <sup>hi</sup> , IgA <sup>+</sup>                                                              |       |
| Plasma-like cells expressing IgG ( <b>IgG<sup>+</sup> plasma-like cells</b> )  | CD19 <sup>+</sup> , CD27 <sup>hi</sup> , CD38 <sup>hi</sup> , IgG <sup>+</sup>                                                              |       |
| Unswitched memory B cells ( <b>USwM</b> )                                      | CD19 <sup>+</sup> , CD27 <sup>+</sup> , IgD <sup>+</sup>                                                                                    | 76,77 |
| IgG switched memory ( <b>IgG<sup>+</sup> SwM</b> )                             | CD19 <sup>+</sup> , CD27 <sup>+</sup> , IgD <sup>-</sup> , IgG <sup>+</sup>                                                                 |       |
| IgA switched memory ( <b>IgA<sup>+</sup> SwM</b> )                             | CD19 <sup>+</sup> , CD27 <sup>+</sup> , IgD <sup>-</sup> , IgA <sup>+</sup>                                                                 |       |
| Unswitched non-classical memory ( <b>M CD27<sup>-</sup> IgD<sup>+</sup></b> )  | CD19 <sup>+</sup> , CD38 <sup>neg/low</sup> , CD24 <sup>+</sup> , CD27 <sup>-</sup> , IgD <sup>+</sup>                                      | 78,79 |
| Switched non-classical memory or ( <b>M CD27<sup>-</sup> IgD<sup>-</sup></b> ) | CD19 <sup>+</sup> , CD38 <sup>neg/low</sup> , CD24 <sup>+</sup> , CD27 <sup>-</sup> , IgD <sup>-</sup>                                      |       |
| Double negative B cell subtype 1 ( <b>DN1-like</b> )                           | CD19 <sup>+</sup> , CD27 <sup>-</sup> , IgD <sup>-</sup> , CD38 <sup>-/+</sup> , CD24 <sup>-</sup> , CD21 <sup>+</sup> , CD11c <sup>-</sup> | 40,80 |
| Double negative B cell subtype 2 ( <b>DN2-like</b> )                           | CD19 <sup>+</sup> , CD27 <sup>-</sup> , IgD <sup>-</sup> , CD38 <sup>-</sup> , CD24 <sup>-</sup> , CD21 <sup>-</sup> , CD11c <sup>+</sup>   |       |
| Double negative B cell subtype 3 ( <b>DN3-like</b> )                           | CD19 <sup>+</sup> , CD27 <sup>-</sup> , IgD <sup>-</sup> , CD38 <sup>-/+</sup> , CD24 <sup>-</sup> , CD21 <sup>-</sup> , CD11c <sup>-</sup> |       |
| Double negative B cell subtype 4 ( <b>DN4-like</b> )                           | CD19 <sup>+</sup> , CD27 <sup>-</sup> , IgD <sup>-</sup> , CD38 <sup>-</sup> , CD24 <sup>-</sup> , CD21 <sup>+</sup> , CD11c <sup>+</sup>   |       |
| B reg-like cells ( <b>B<sub>reg</sub>-like cells</b> )                         | CD19 <sup>+</sup> , CD38 <sup>+</sup> , CD24 <sup>+</sup>                                                                                   | 81,82 |

621

622 **FIGURE LEGENDS**

623



624 **Fig. 1: Human colostrum and peripheral blood are differentially enriched in**  
625 **multiple B lymphocyte subtypes. a)** Concentrations of transitional and naïve B  
626 cells in peripheral blood and colostrum. **b)** Concentrations of B<sub>reg</sub>-like, DN2-like and  
627 plasma-like cells in peripheral blood and colostrum. **c)** Concentrations of USwM  
628 and SwM in blood and colostrum (above) and subsampling comparing samples  
629 from mothers with BMI<25 ("lean") and mothers with BMI>30 ("obese") (below).  
630 Statistical analysis was performed using Mann-Whitney U tests, comparing B cell  
631 subsets concentrations (live cells/ml or original blood or colostrum) from mothers  
632 with obesity (n=25) or with a lean BMI (n=23). \*p < 0.05, \*\*p< 0.01, \*\*\*p < 0.001  
633 and \*\*\*\*p < 0.0001.

634

635 **Fig. 2: Maternal BMI and BF% correlates with the frequency of B<sub>reg</sub>-like,**  
636 **double-negative (DN2) and plasma-like cells in colostrum.** Comparisons of **a)**  
637 B<sub>reg</sub>-like, **b)** DN2-like and **c)** plasma-like cell % in colostrum from lean and obese  
638 cohorts (left of the 3 panels), and correlations with between pre-pregnancy BMI  
639 values (middle) and BF% (right). Doted lines represent SE. Mann-Whitney U tests  
640 were used to compare B cell subsets in colostrum from both cohorts. Pearson  
641 correlations were used to investigate the relationships between B cell subsets %  
642 and BMI or BF%. \*\*p < 0.01 and \*\*\*\*p < 0.0001.

643

644 **Fig. 3: IgG production is increased in colostrum from mothers with obesity.**  
645 **a)** Relative contribution of IgA<sup>+</sup> and IgG<sup>+</sup> plasma-like cells between cohorts (mean  
646 ± SD). Comparisons performed using Mann-Whitney U test \*\*p<0.01. **b)** Intra-  
647 individual correlation analysis of IgA<sup>+</sup> and IgG<sup>+</sup> colostrum plasma-like cells in both  
648 groups. Spearman tests compared Z-Scores of IgA<sup>+</sup> and IgG<sup>+</sup> plasma-like cells  
649 proportions. **c)** Comparison of IgG and IgA-secreting colostrum cells in both  
650 cohorts (left), and Pearson correlations with maternal BMI (middle) and BF%  
651 (right). **d)** Concentration of total IgG (mg/ml) and GlcNAc-specific IgG (ng/ml)  
652 (above) and total IgA (mg/ml) in both groups (individual data, with mean ± SD).  
653 Comparisons performed through Mann-Whitney U test \*p < 0.05, \*\*p<0.01, \*\*\*\*p <  
654 0.0001.

655

656 **Fig. 4: IgG<sup>+</sup>-DN2 cells and IgG<sup>+</sup>-plasma like cells contribute to local IgG**  
657 **production in obesity. a)** Representative colostrum DN2-like B cells plot showing  
658 IgA or IgG expression. **b)** Correlations between IgG<sup>+</sup> plasma-like cells and DN2-  
659 like cell proportions with IgG concentrations in lean (red) and obese (gray) cohorts.  
660 **c)** Correlations between IgG<sup>+</sup> plasma-like cells and DN2-like cell proportions with  
661 concentrations of IgG-secreting cells in lean (red) and obese (gray) cohorts.  
662 Trends were compared by Spearman rank.

663

664 **Fig. 5: Obese colostrum prompts cytokines production by human**  
665 **macrophages.** Supernatant concentrations of **a)** TNF- $\alpha$  and **b)** IL-6 produced over  
666 a 16h period by human macrophages (black), human macrophages incubated for  
667 24 h with filtered colostrum supernatant from the lean cohort (gray) or obese cohort  
668 (red). Each timepoint represents the mean of three biological replicates  $\pm$ SD.  
669 Comparisons with two-way ANOVA and Turkey's post-hoc test. \* $p < 0.05$ ,  
670 \*\* $p < 0.01$ , \*\*\* $p < 0.001$  and \*\*\*\* $p < 0.0001$ .

671

672 **Fig. 6: Overview of obesity-related alterations in B lymphocyte subtypes in**  
673 **maternal peripheral blood and colostrum.** Transitional B cells (1) differentiate  
674 into B<sub>reg</sub> cells (2) and migrate from the blood into the lactating duct (2a).  
675 Transitional B cells (1) also migrate to secondary tissues. There, transitional B cells  
676 differentiate into naïve B cells (3) and enter germinal centers (3a) or are activated  
677 through the extrafollicular pathway to differentiate into DN2-like B cells (4). These  
678 (4) could migrate to multiple tissues, including the lactating mammary gland and  
679 colostrum (4a), where they are increased in obesity. Here we provide evidence that  
680 DN2-like B cells could differentiate into IgG<sup>+</sup> plasma-like cells (6a) and IgG-  
681 secreting cells (7a) to increase IgG produced in obesity (8). In the germinal center,  
682 naïve B cells (3), after germinal center reaction (3a) and can differentiate into two  
683 subpopulations: (5) memory B cells or (6) plasma-like cells. Memory B cells  
684 migrate through blood to mammary acini and colostrum (5a). We have shown that  
685 in obesity, colostrum USwM cells are decreased. Finally, colostrum IgG-secreting

686 cells and sIgG increase in obesity (7a) while colostrum IgA-secreting cells and sIgA  
687 are reduced (8). Created with BioRender.com

688

689 **Supplementary Fig. 1: Gating strategy used for manual gating of B cells**  
690 **subsets in colostrum.** Transitional B cells in brown, naïve B cells in yellow,  
691 regulatory B cells in green, memory B cells in orange, plasma-like cells in red, and  
692 double-negative B cell subsets (DN1, DN2, DN3 and DN4) in blue. Dot plots are  
693 represented in Contour plots, at least at 5% of level and included outliers in FlowJo  
694 X® version Software, BD Biosciences.

695

696 **Supplementary Fig. 2: CD19<sup>+</sup> B cells are decreased in the colostrum from**  
697 **mothers with obesity a)** Total CD19<sup>+</sup> B cells in blood and in colostrum from both  
698 cohorts. Groups compared using Mann-Whitney U test. \*\*\*p < 0.001.

699

700 **Supplementary Fig. 3: Human colostrum contains percentages of**  
701 **subpopulations of differentiated B cells enriching in comparison with blood.**  
702 **a)** Scatter plots comparing transitional and naïve B cells in blood and colostrum. **b)**  
703 Scatter plots comparing regulatory B cells (Breg-like), double negative 2 (DN2-like)  
704 and plasma-like cells in blood and in colostrum. **c)** Scatter plots comparing  
705 unswitched memory (USwM) and switched memory B cells (SwM) in blood and  
706 colostrum (above). Scatter plots comparing USwM and SwM in colostrum from  
707 lean and mothers with obesity (below). Statistical analysis was performed using the  
708 Mann-Whitney U test, comparing B cell subsets percentages in blood from mothers  
709 with obesity (n=25) against lean subjects as control (n=23). \*p < 0.05, \*\*p < 0.01,  
710 \*\*\*p < 0.001 and \*\*\*\*p < 0.0001.

711

712 **Supplementary Fig. 4. Obesity induces differentiation of plasma-like cells on**  
713 **CD19 low expression group. a,b)** Examples of histograms from plasma-like cells  
714 analyzed in function of CD19 expression, showing negative CD19 population (left)  
715 and positive CD19 expression groups (right), from colostrum of lean and mothers.  
716 **c)** Column bar graph comparing plasma-like cells in function of percentage of (% of

717 CD19<sup>+</sup>) low (no pattern), median (square pattern), and high (line pattern) CD19  
718 expression groups. Bars indicate the mean  $\pm$  SD. Statistical analysis was  
719 performed using the Kruskal Wallis test for multiple comparisons (Lean n=23 and  
720 obesity n=25) assay. \*\*\*p<0.001.

**Fig. 1**

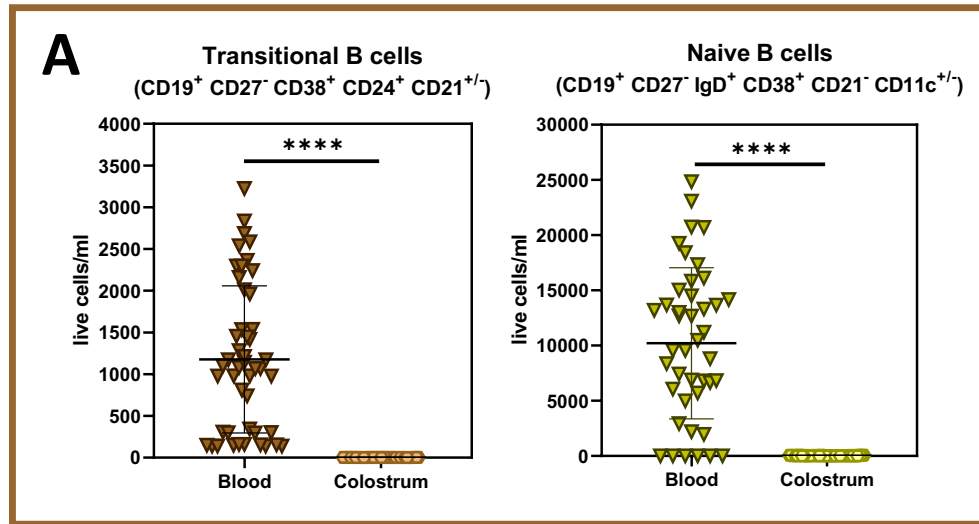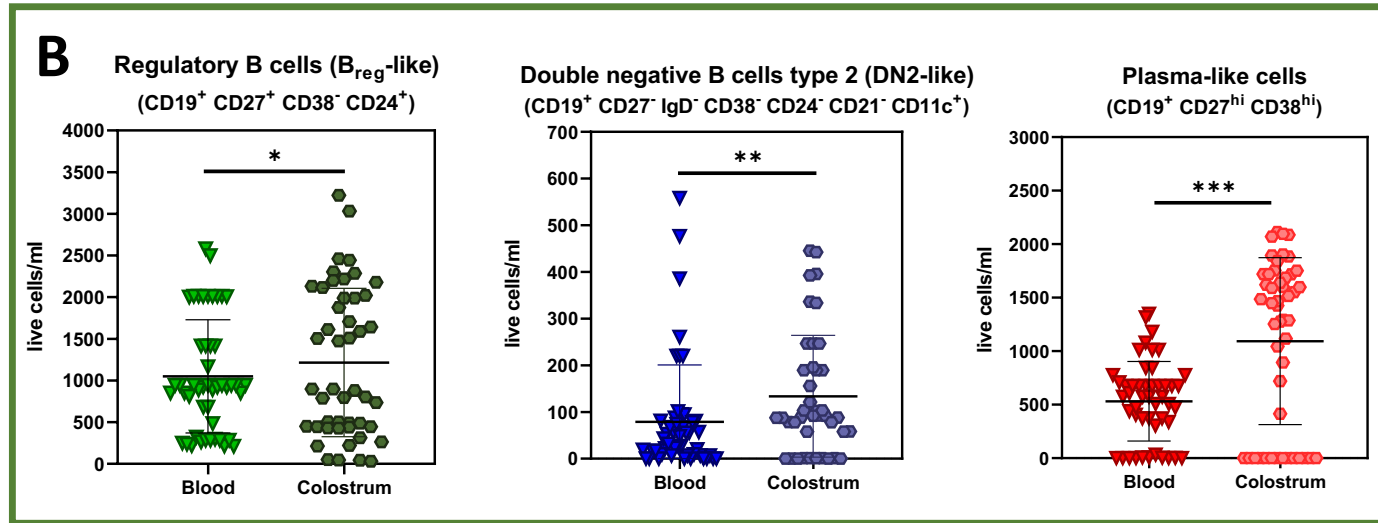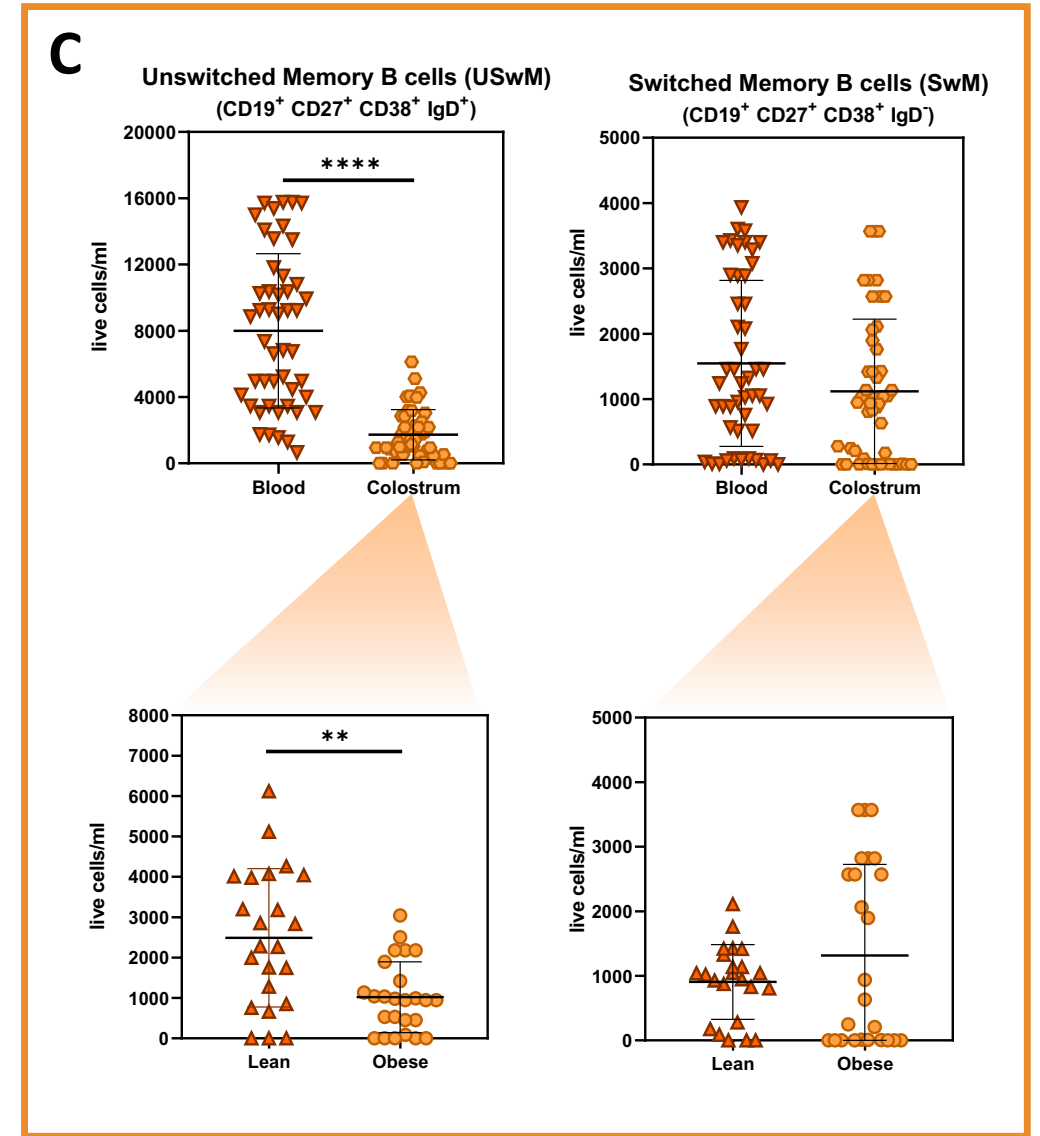

**Fig. 2**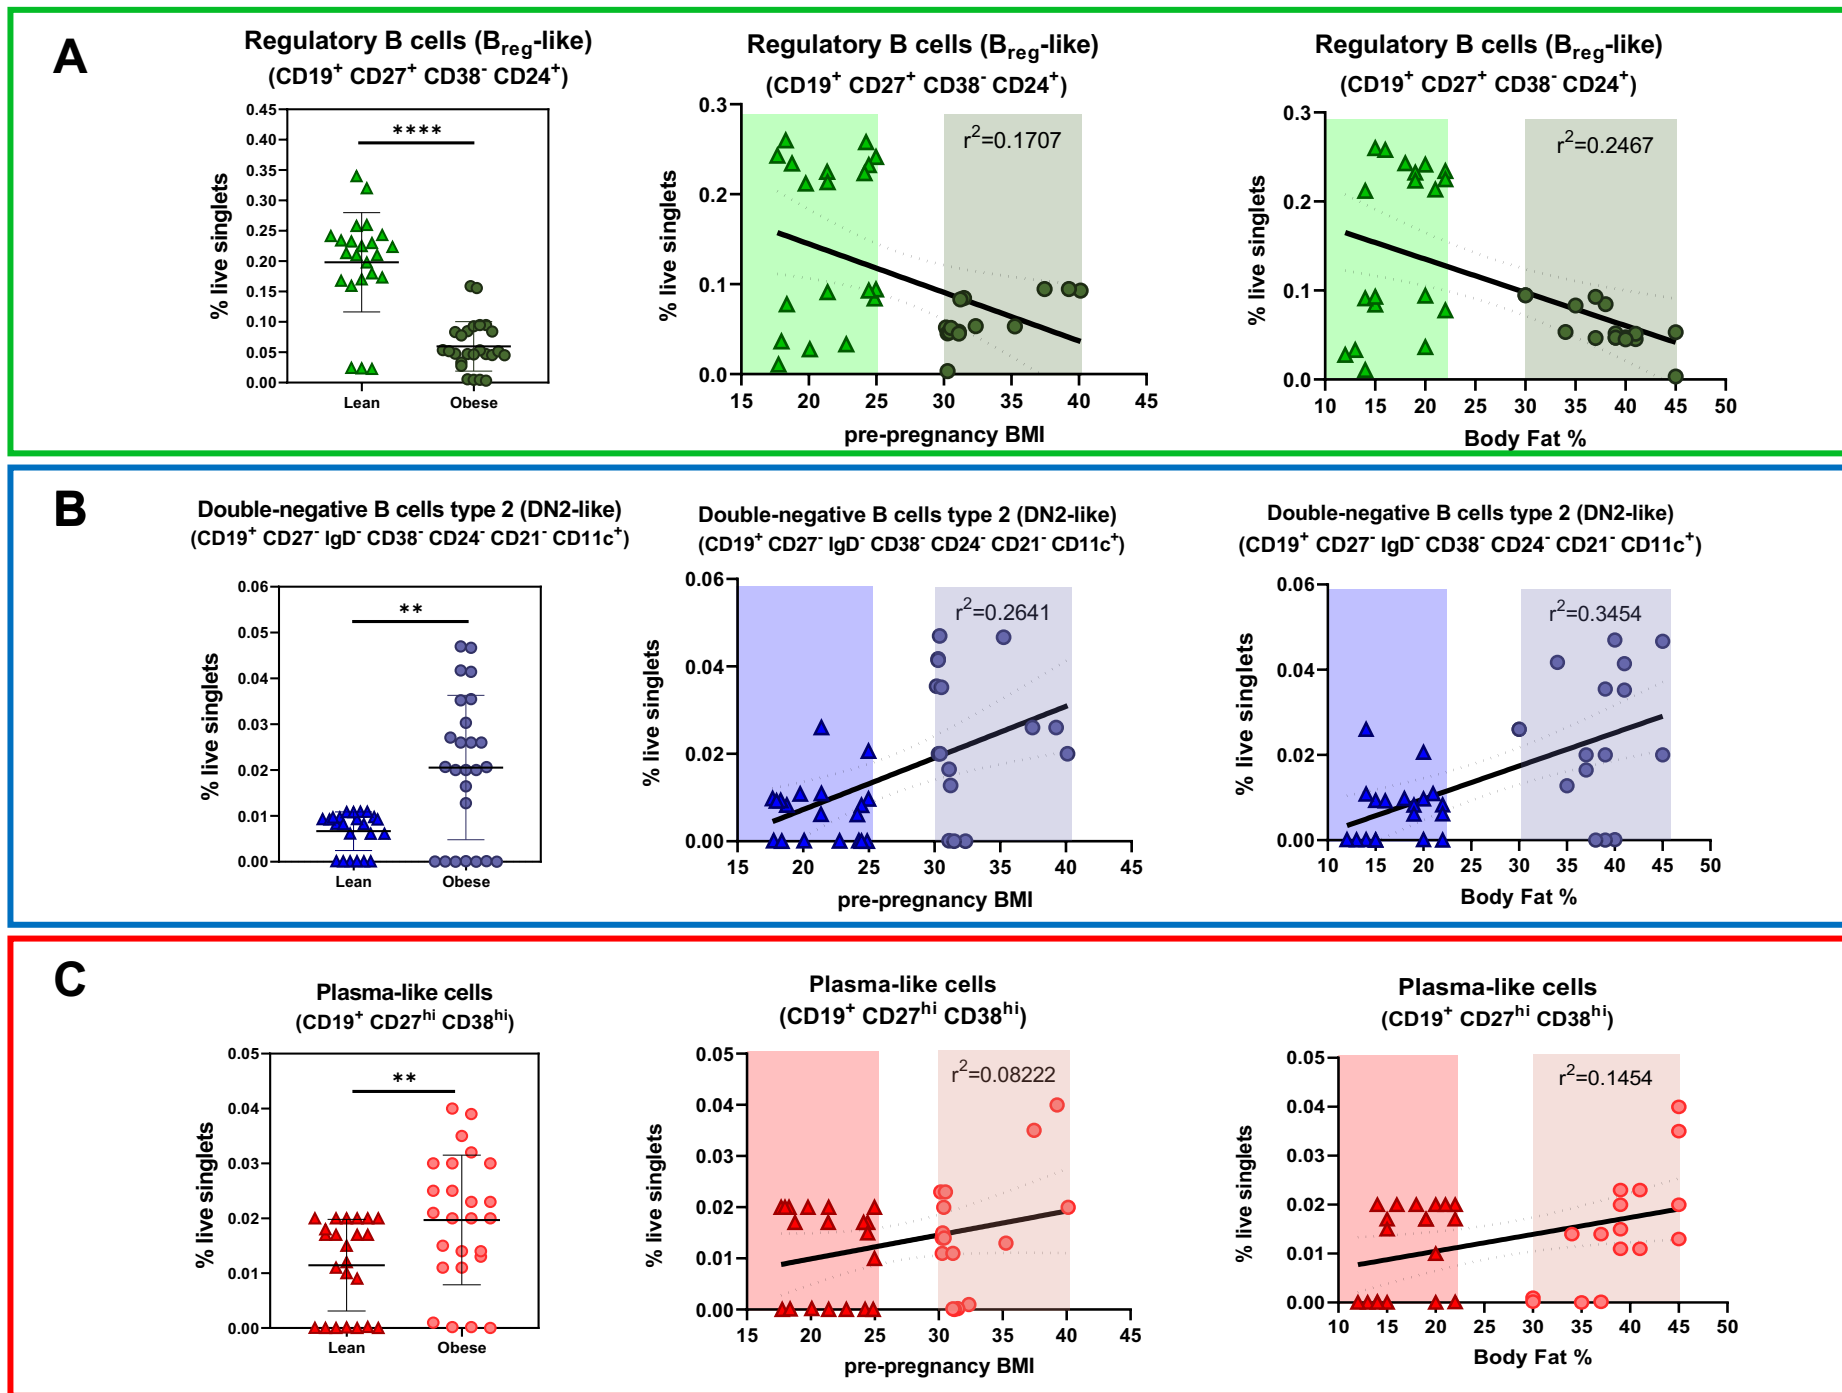

**Fig. 3****A**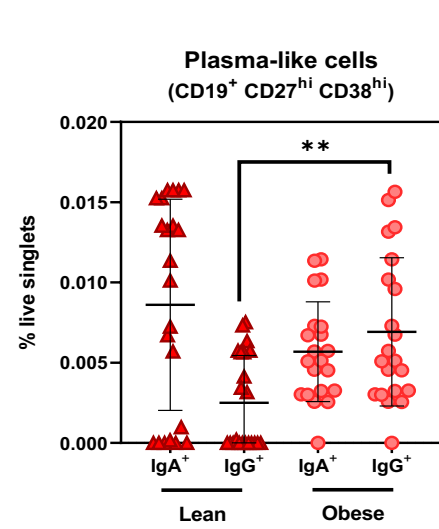**B**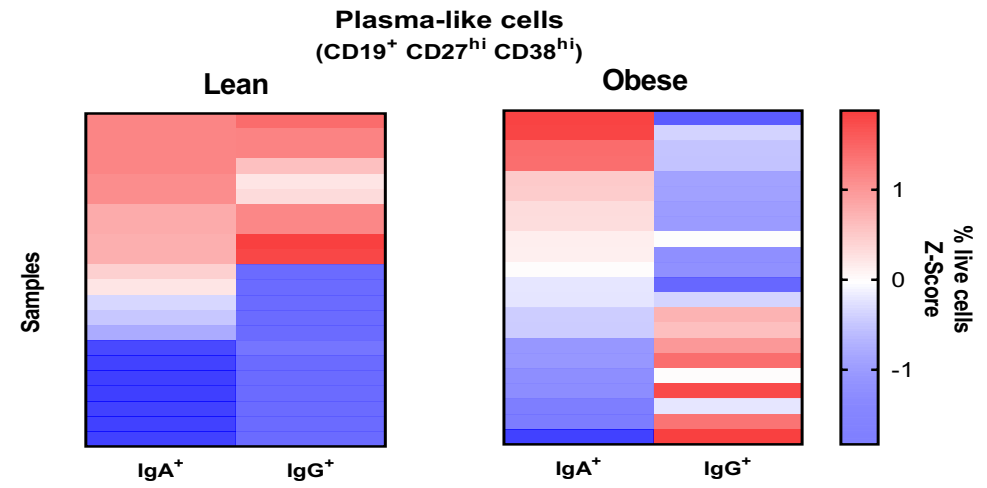**C**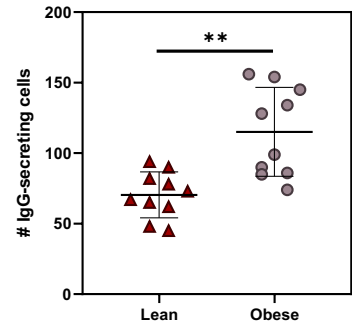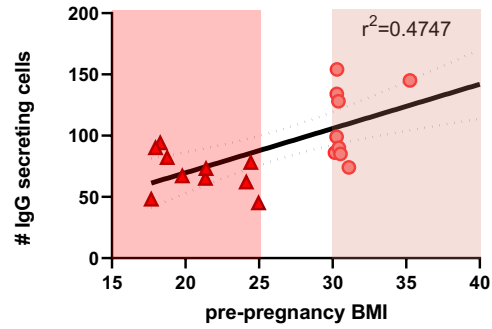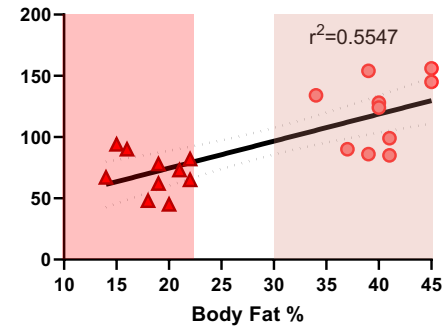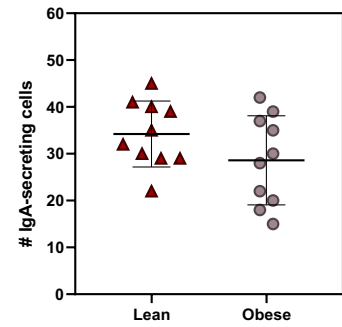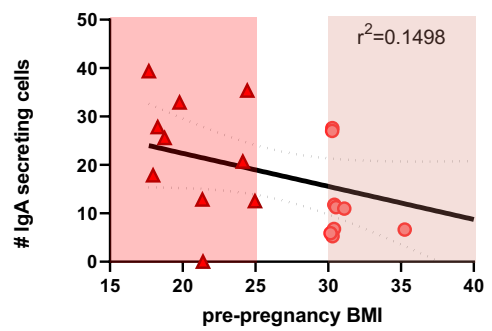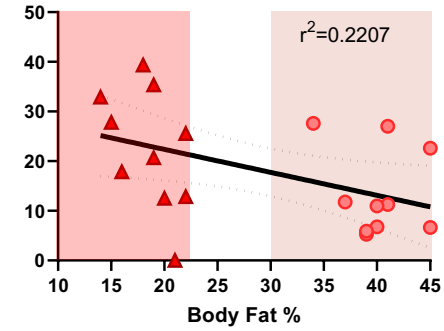**D**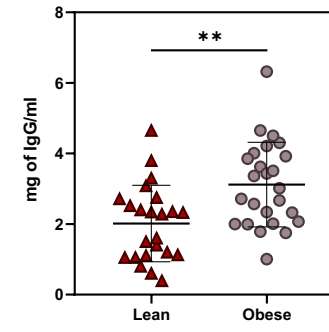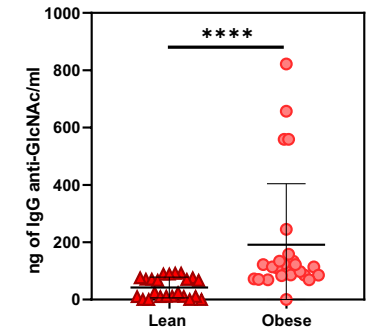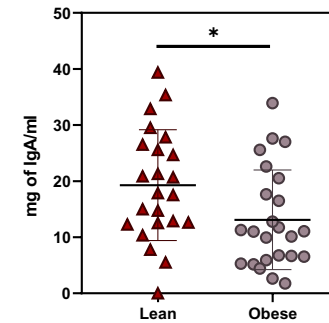

Fig. 4

A

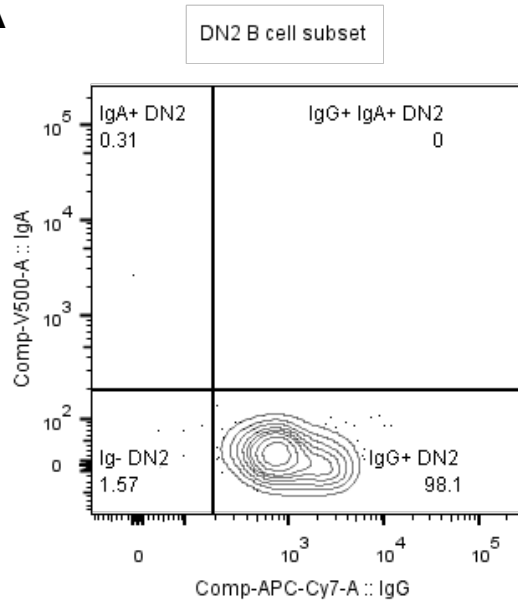

B

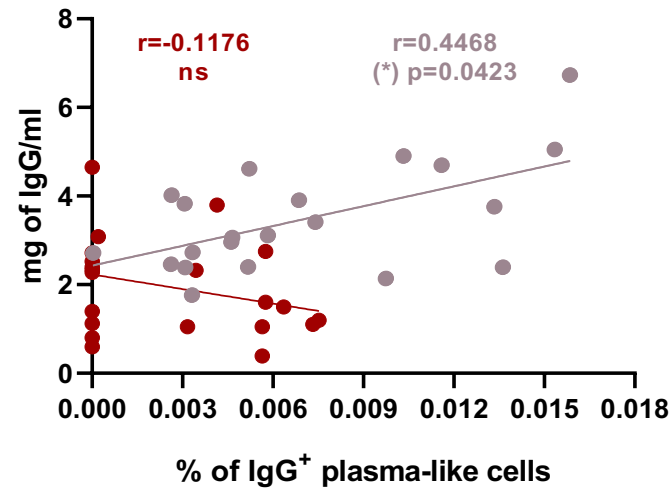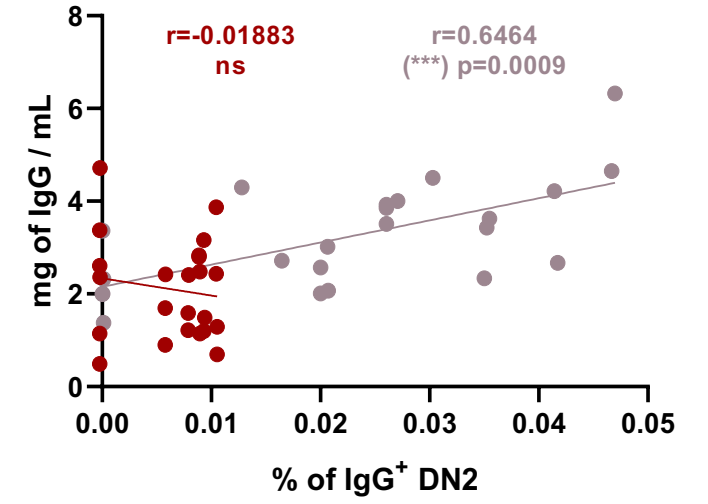

C

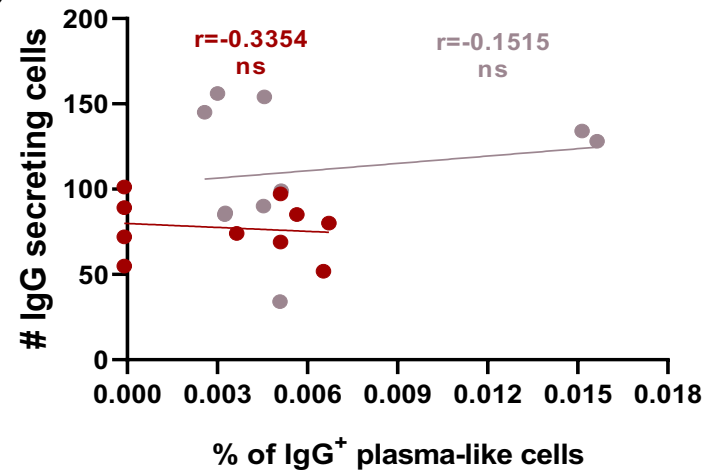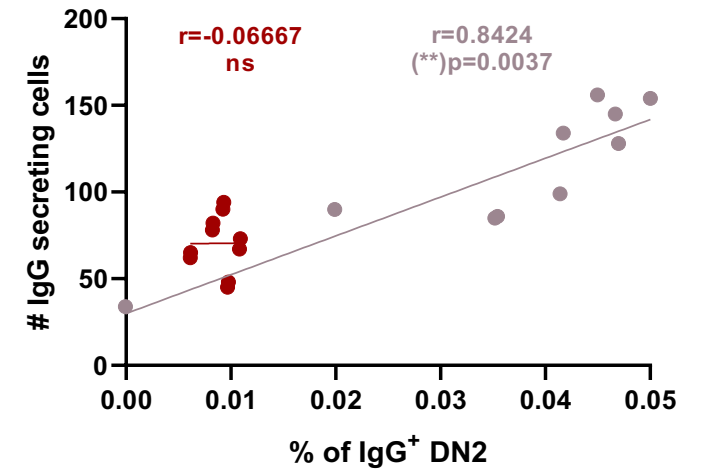



Fig. 5

A

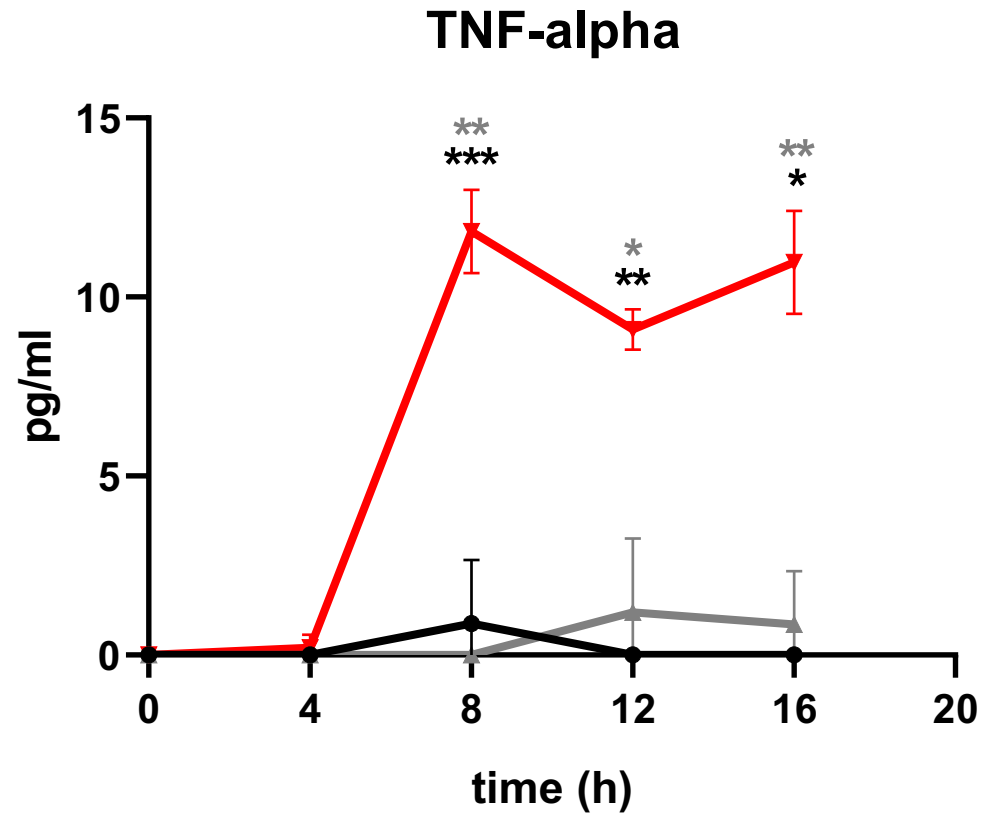

B

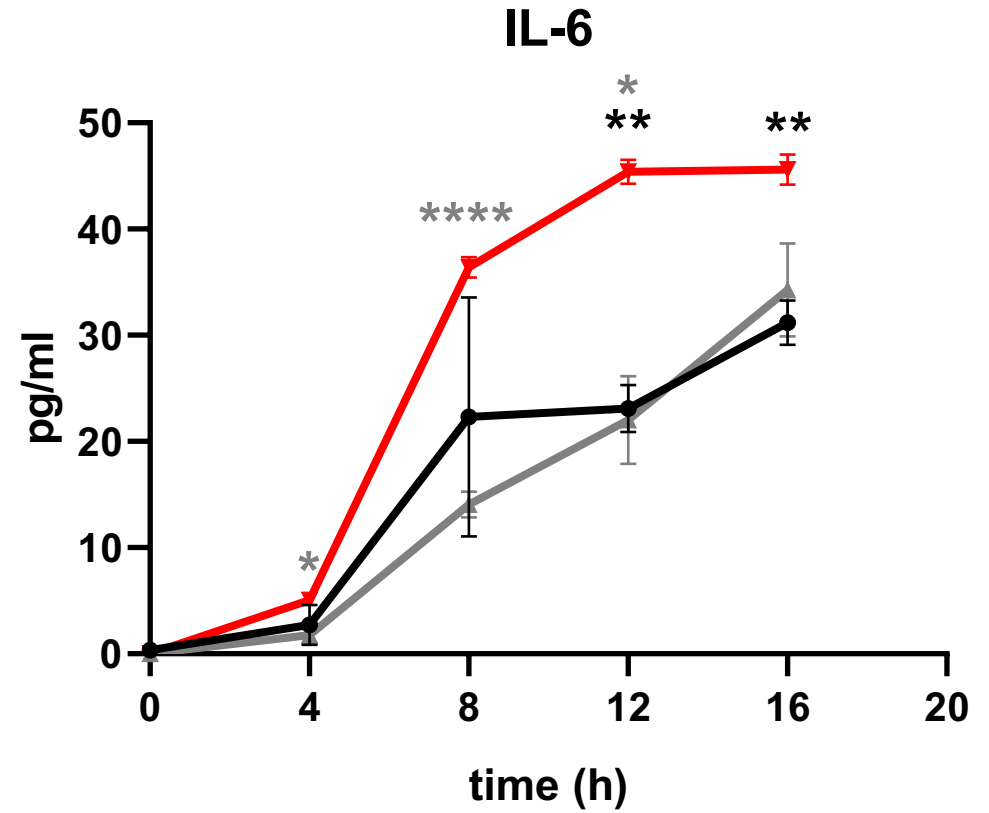

- Unstimulated
- ▲ Co-incubation with lean colostrum supernatant
- ▼ Co-incubation with obese colostrum supernatant

**Fig. 6**

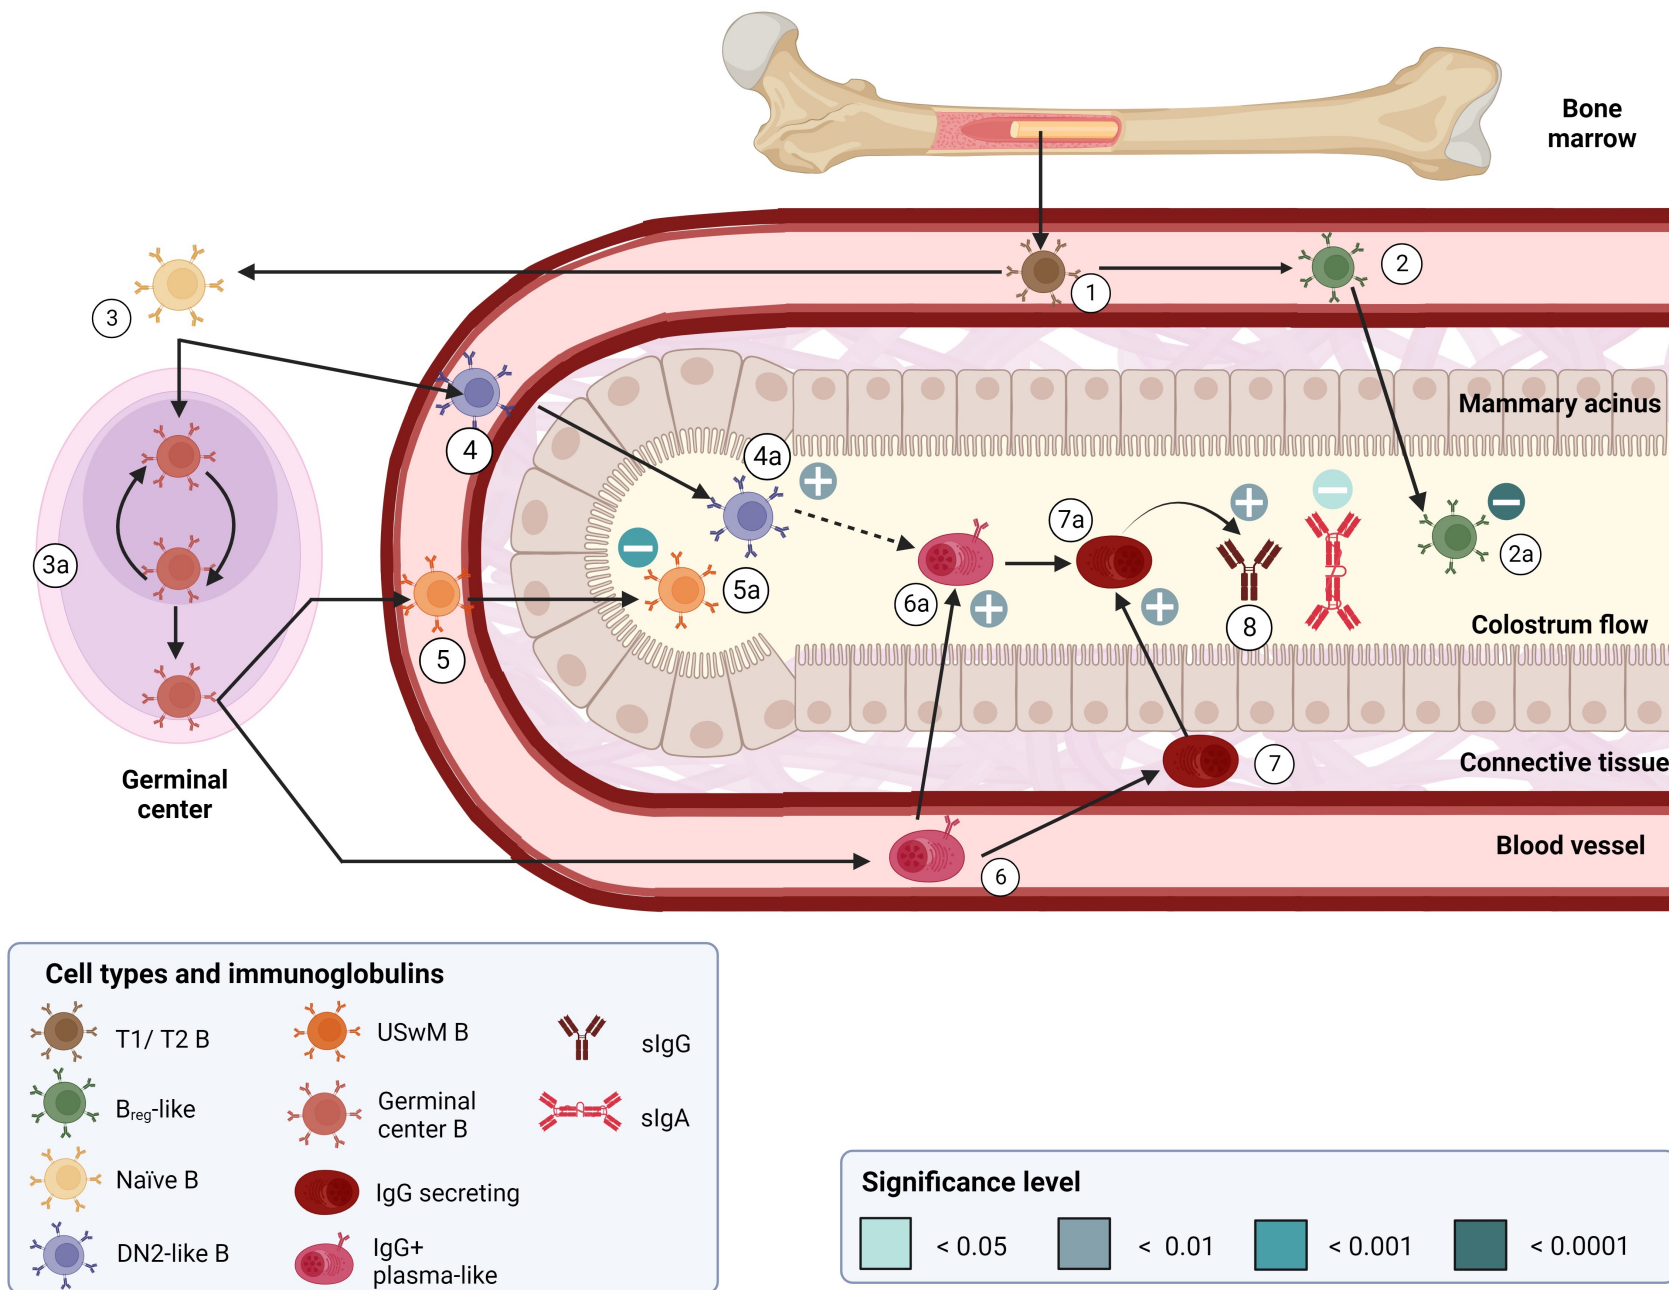

# Supplementary Fig. 1

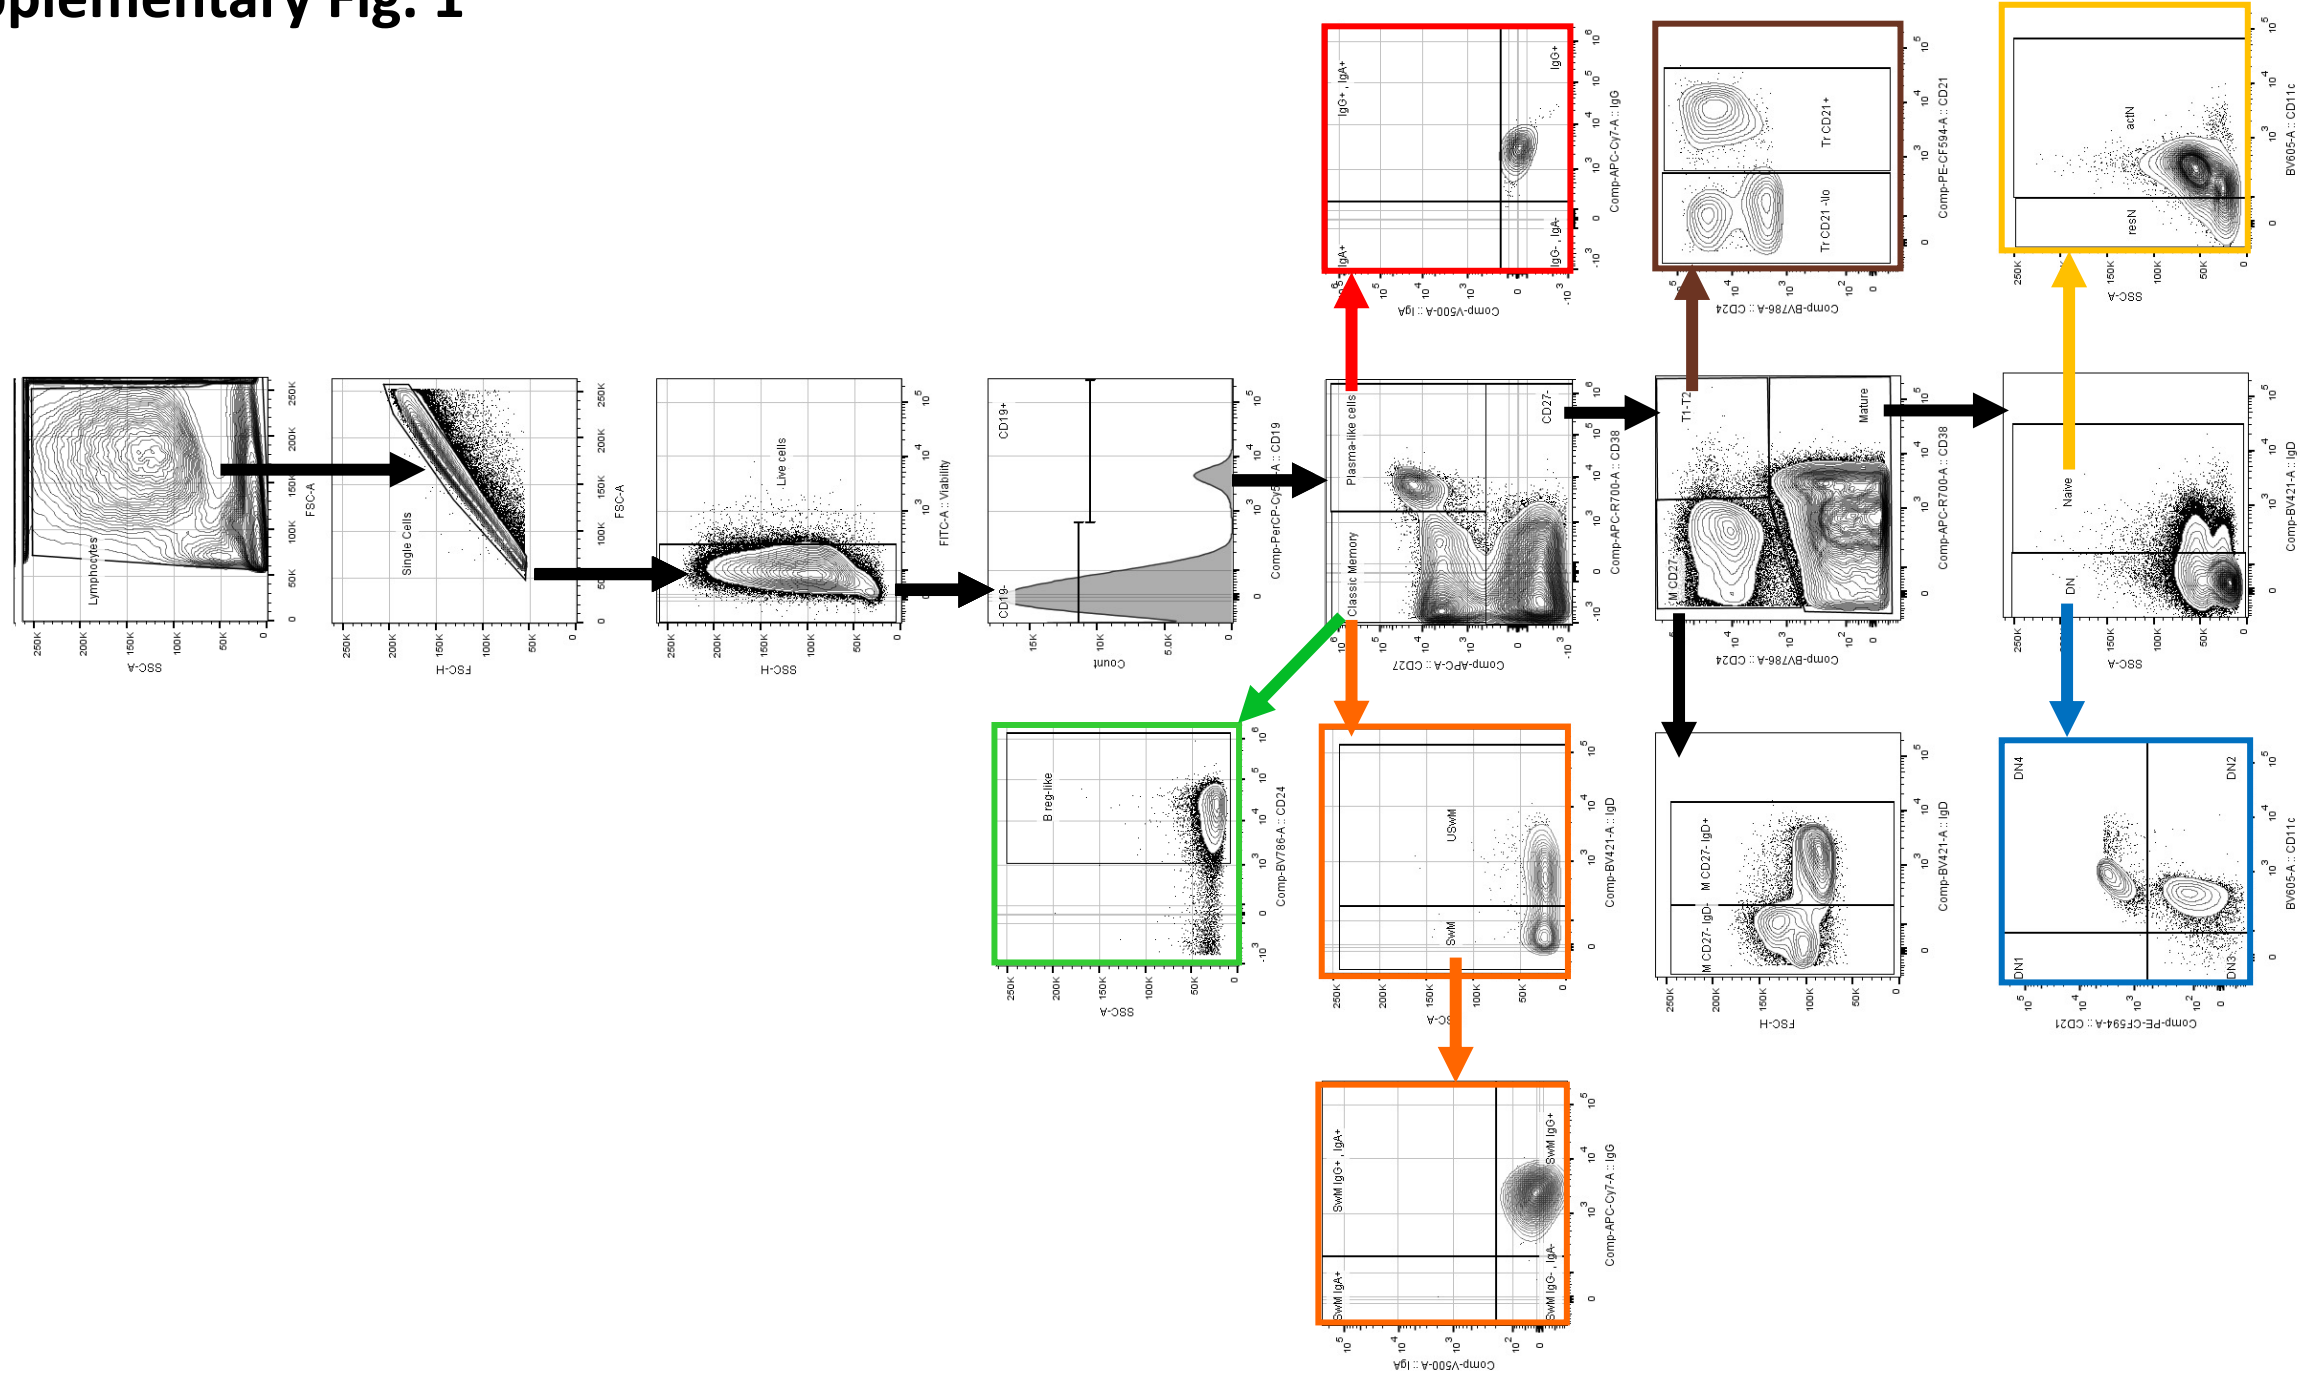

# Supplementary Fig. 2

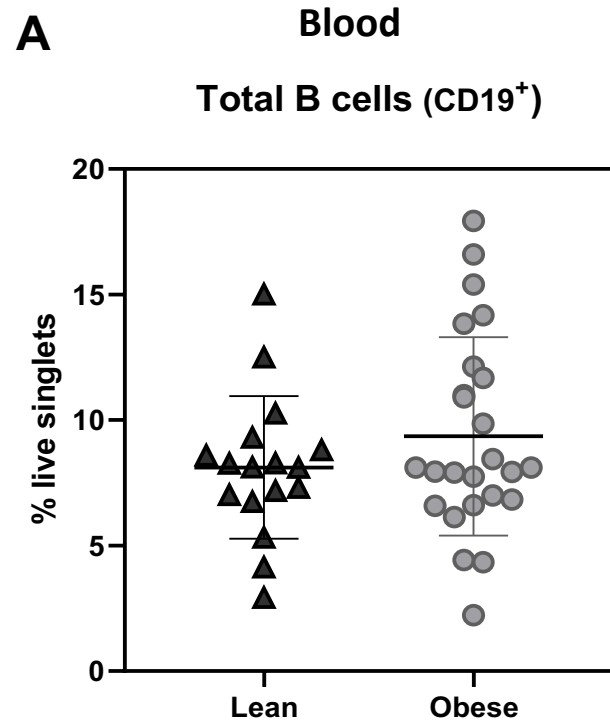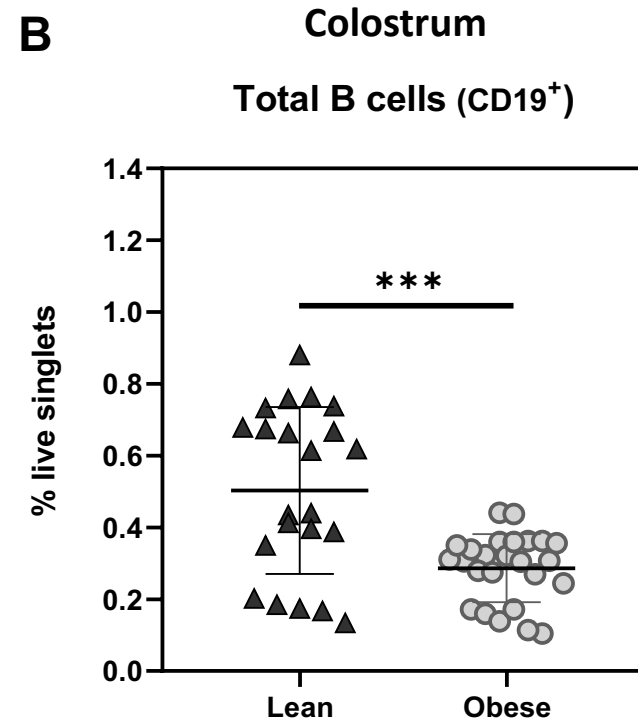

# Supplementary Fig. 3

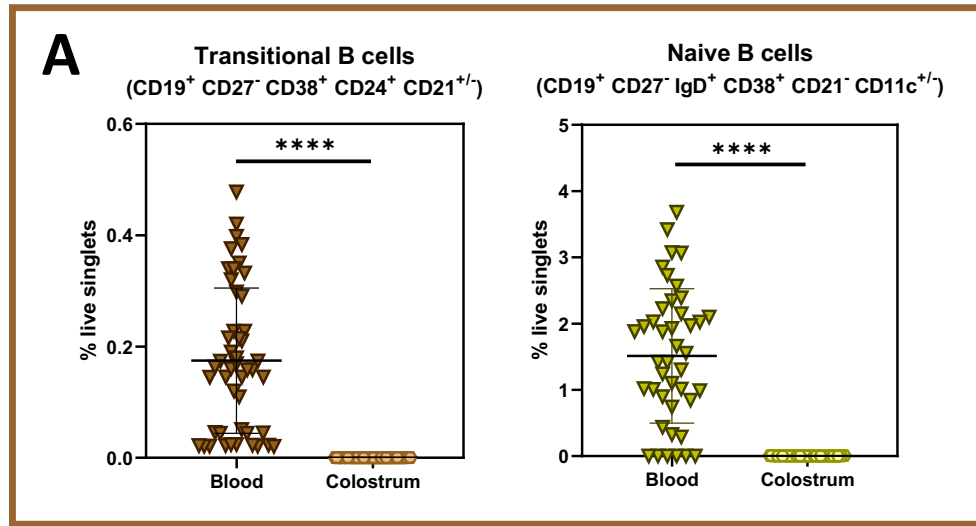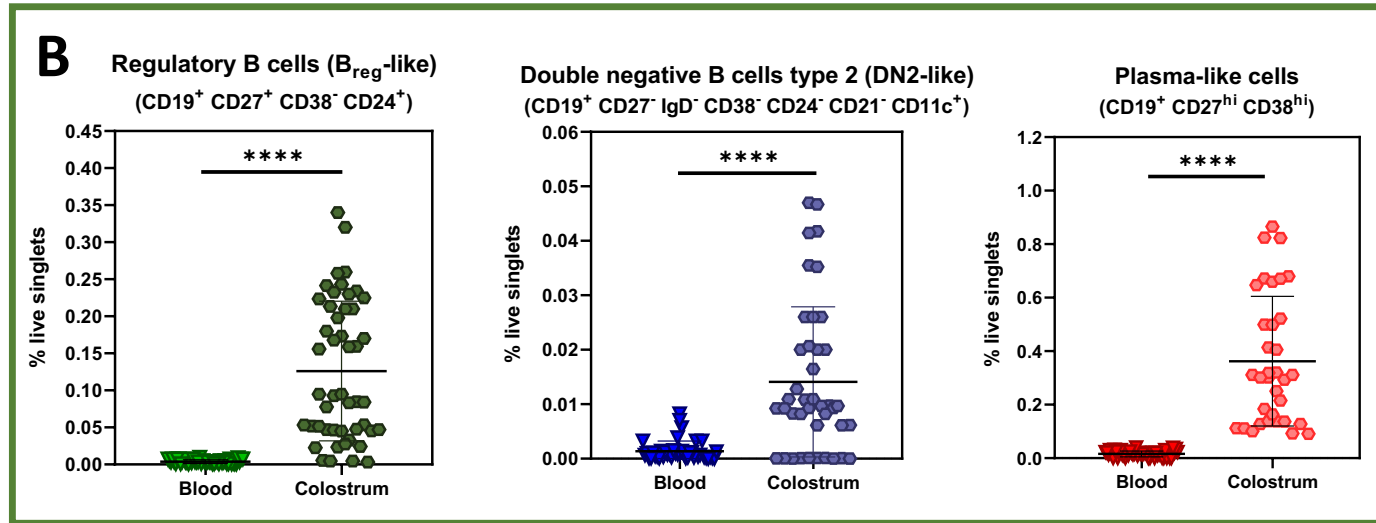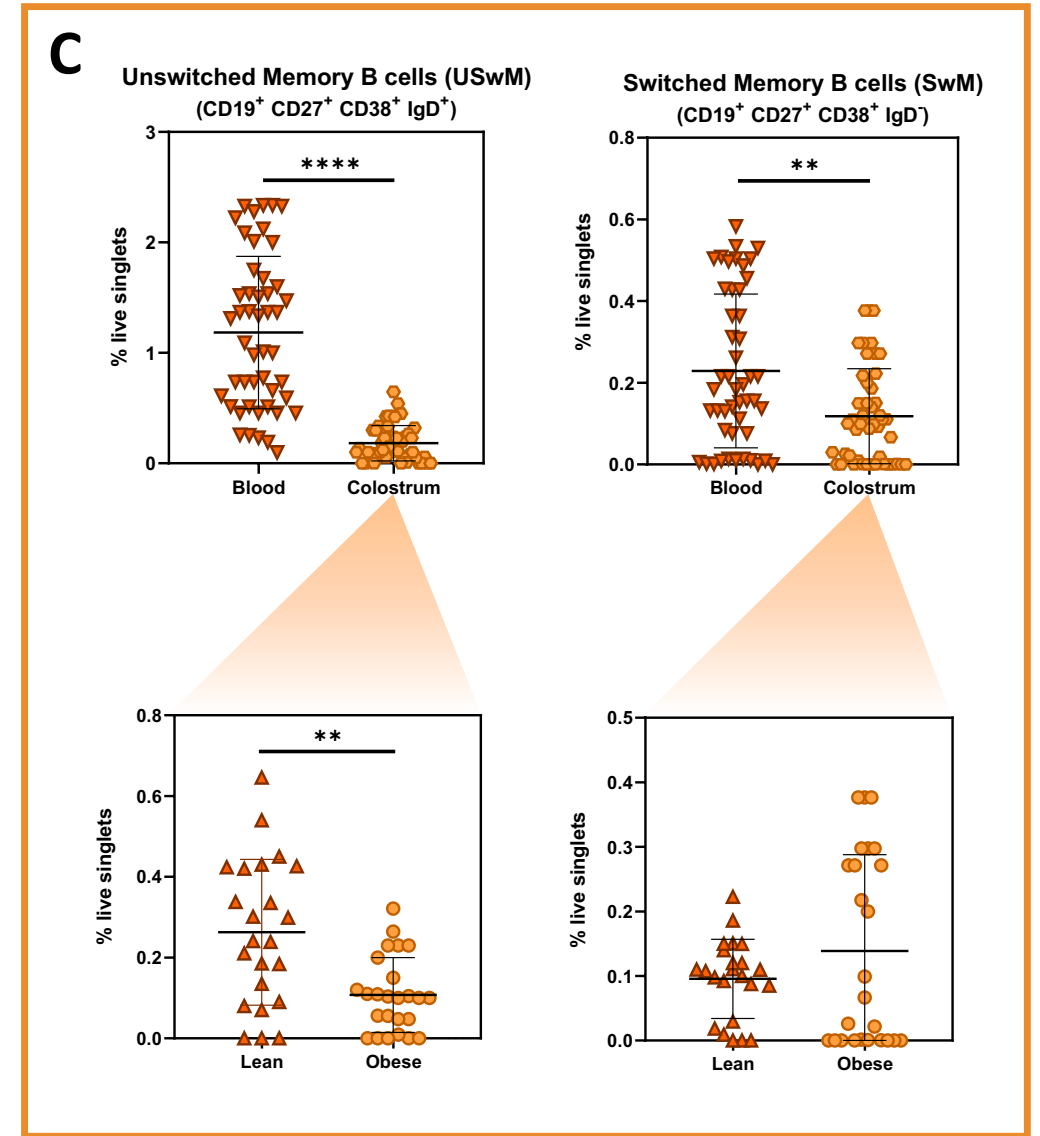

# Supplementary Fig. 4

**A**

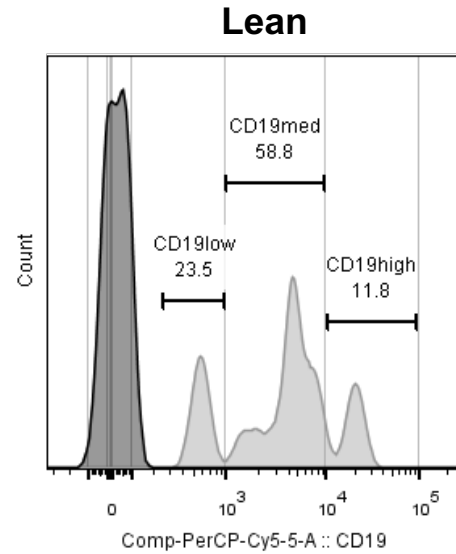

**B**

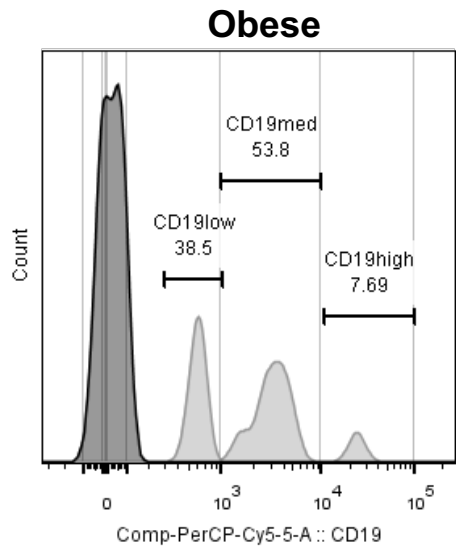

**C**

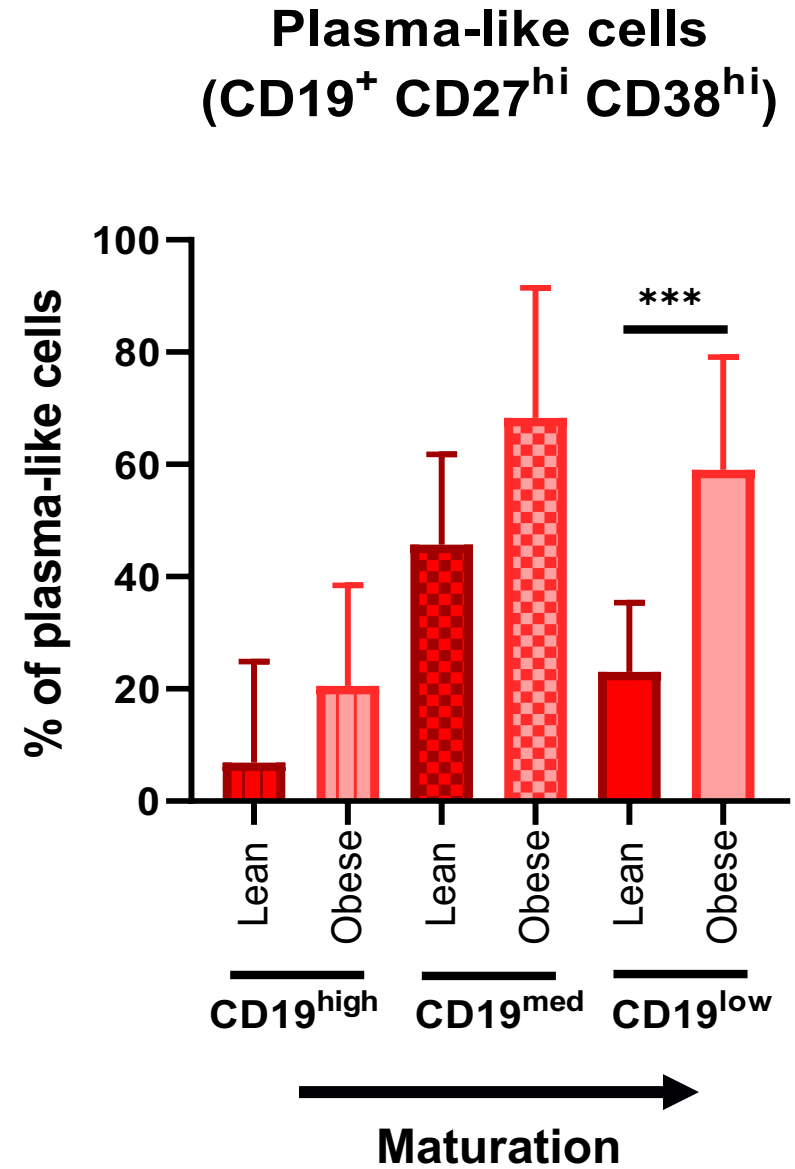

Source: https://medrxiv.org/content/10.1101/2023.09.01.23294956.full.pdf
